# Supplementary material
Source: PubMed Central journal article supplement (PMC2689811)
Supplement: en.2008-1503_2.pdf [file en.2008-1503_2.pdf]

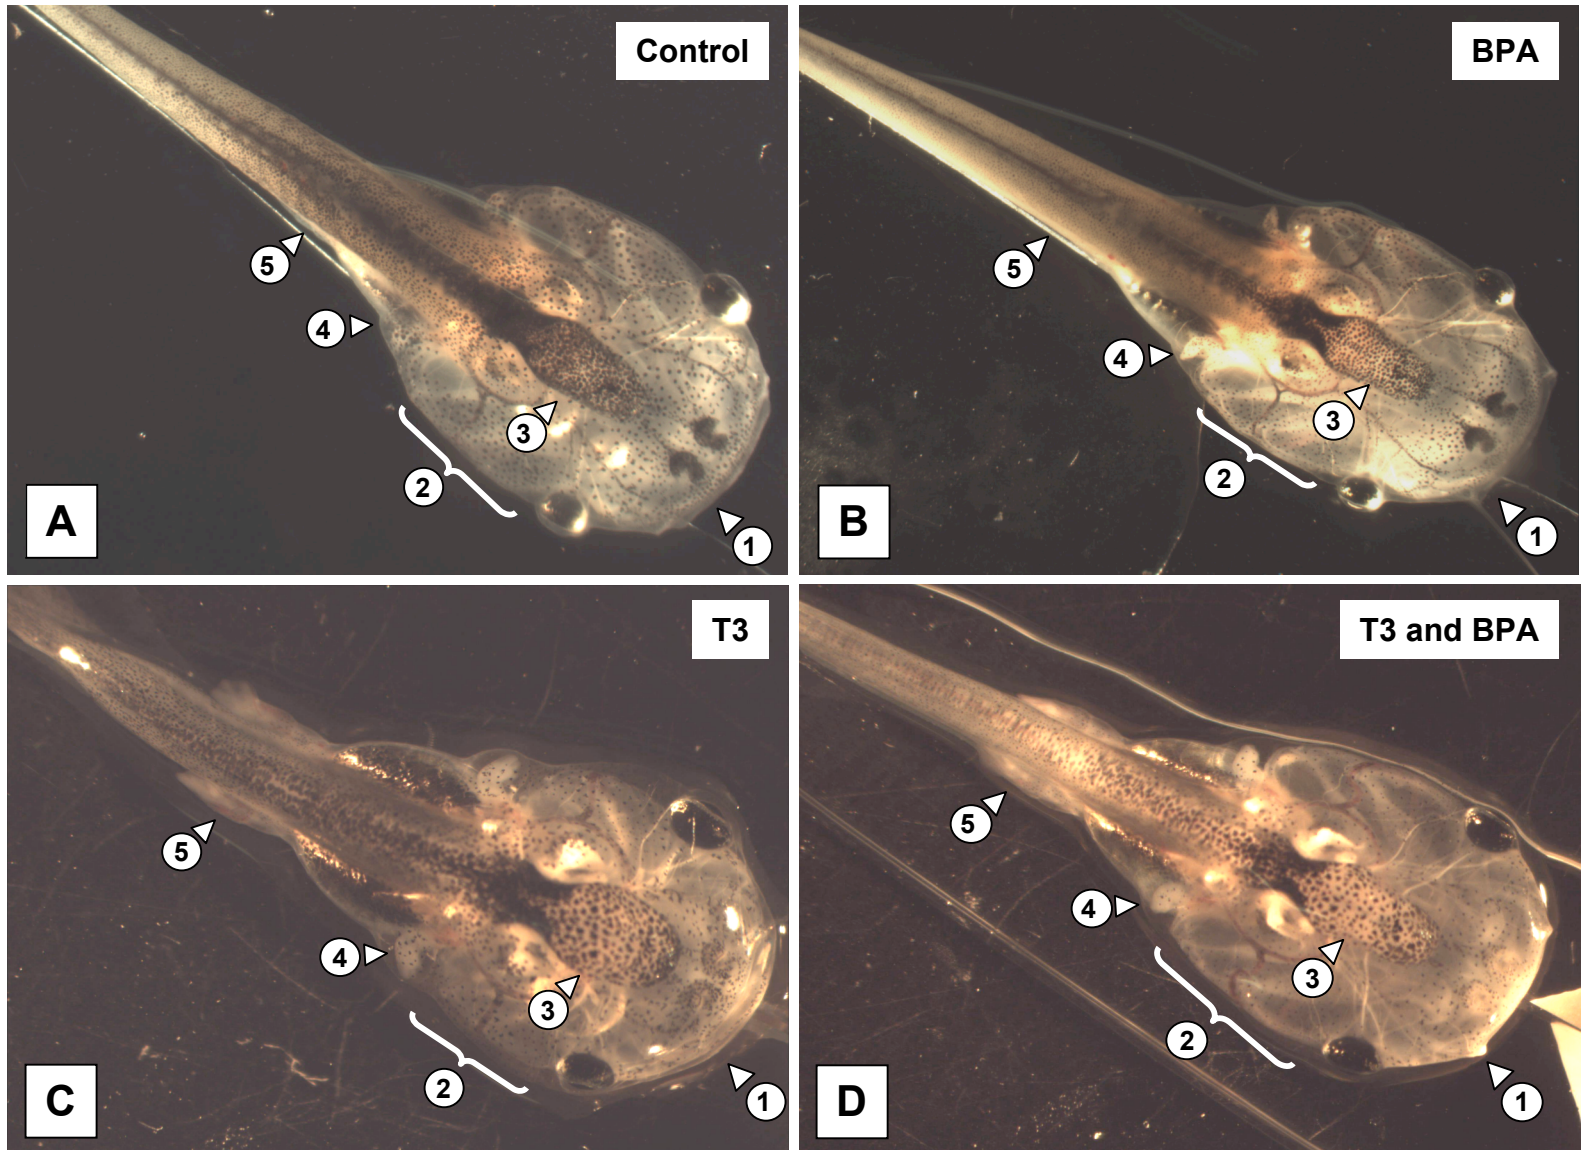

Supplemental Fig. S2

**Supplemental Fig. S2.** BPA inhibits many morphological aspects of T3-induced metamorphosis as early as after 4 days of treatment. At day 0, tadpoles were the same size and at the same stage (stage 54). Representative control (A), T3 (B), BPA (C) and T3+BPA (D) treated tadpoles are shown after 4 days of treatment. Note that after 4 days of treatment, animals treated with T3 alone and animals treated with the combination of T3+BPA were morphologically distinct as highlighted by the gills (#2) and hindlimb (#5), and the morphology of the BPA only treated animals looked similar to that of the control treated tadpoles. Numbers 1-5 highlight regions that were changed after T3 treatment (C) when compared to control or BPA-treated animals (A&B). The T3-induced changes were drastically inhibited by BPA (D). Number legend: 1: Head/jaw region; 2: Gills; 3: Brain; 4: Forelimb; 5: Hindlimb. This experiment was repeated more than 4 times with similar results.
