# Supplementary material
Source: PubMed Central journal article supplement (PMC2689811)
Supplement: en.2008-1503_3.pdf [file en.2008-1503_3.pdf]

**Supplemental Table S1:**

Primers and probes used in RT-qPCR with Taqman assay

| <b>Gene</b>                 | <b>Forward Primer</b>       | <b>Reverse Primer</b>       | <b>FAM dye-labeled probe</b> |
|-----------------------------|-----------------------------|-----------------------------|------------------------------|
| <b>THbZIP</b>               | GGACAAGTGAGAAGCAAGAACAAG    | GGGTTGGGCAAGGAACAAG         | TTCTGCTGCCCATTCAG            |
| <b>ST3</b>                  | CACTTGTAGCCATTGTATCACACTCA  | GCCATGATCTTTCTGAGGCTTTTC    | ATGCATTCTCACAAAGCTGT         |
| <b>TR<math>\beta</math></b> | CAAGAGTTGTTGATTTTGCCAAAAAGC | ACATGATCTCCATACAACAGCCTTT   | CTGCCATGTGAAGACC             |
| <b>MMP2</b>                 | GACGATGATGAGCTTTGGACACTA    | GAACTCTCCATCTGCATTACCATACTT | ACAACCTGGCCTTCTCC            |
| <b>TIMP2</b>                | GGAGATCGCTGGAAAGAAGGAATAT   | GCACGATGAAGTCACACAGGATTA    | ATGCATCTTTCCATCACCATC        |
| <b>BMP4</b>                 | TGAGGTGATTTCTTCAGCAGAACTG   | TCCATTTGCAGCTATGGGTTTCATA   | CCGGTGGAAACCCTCA             |
| <b>rpl8</b>                 | AGAAGGTCATCTCATCTGCAAACAG   | CAATACGACCACCTCCAGCAA       | CAACCCCAACAATAGCT            |
