# Supplementary material
Source: PubMed Central journal article supplement (PMC2689811)
Supplement: en.2008-1503_5.pdf [file en.2008-1503_5.pdf]

**Supplemental Table S3:**

Genes significantly up-regulated in the presence of T3 alone in comparison to the untreated samples

|    | <b>Probe Name</b> | <b>GenBank</b> | <b>Fold change</b> |
|----|-------------------|----------------|--------------------|
| 1  | A_10_P000358      | AF170337       | 291.2              |
| 2  | A_10_P027545      | Z27093         | 38.4               |
| 3  | A_10_P027263      | U41855         | 22.4               |
| 4  | A_10_P027181      | U08407         | 14.8               |
| 5  | A_10_P023003      | CB565547       | 13.6               |
| 6  | A_10_P006927      | BC077649       | 13.6               |
| 7  | A_10_P005433      | BC073180       | 13.5               |
| 8  | A_10_P007842      | BC081152       | 12.5               |
| 9  | A_10_P009875      | BE491416       | 12.0               |
| 10 | A_10_P027253      | U37376         | 11.7               |
| 11 | A_10_P014922      | BC093541       | 11.7               |
| 12 | A_10_P012677      | BG811190       | 11.7               |
| 13 | A_10_P025257      | CF548920       | 10.9               |
| 14 | A_10_P023290      | CB943692       | 10.4               |
| 15 | A_10_P011453      | BG022401       | 8.3                |
| 16 | A_10_P015773      | BJ640739       | 7.0                |
| 17 | A_10_P002535      | BC043864       | 6.8                |
| 18 | A_10_P004667      | BC071004       | 6.6                |
| 19 | A_10_P026167      | CN318237       | 6.4                |
| 20 | A_10_P000120      | AB075925       | 6.3                |
| 21 | A_10_P023517      | CD253165       | 5.9                |
| 22 | A_10_P007330      | BC078565       | 5.9                |
| 23 | A_10_P025128      | CF522012       | 5.6                |
| 24 | A_10_P011869      | BG162076       | 5.4                |
| 25 | A_10_P008965      | BC085060       | 5.4                |
| 26 | A_10_P004455      | BC070671       | 5.3                |
| 27 | A_10_P024727      | CD811210       | 5.2                |
| 28 | A_10_P007955      | BC081272       | 5.1                |
| 29 | A_10_P007497      | BC079830       | 5.0                |
| 30 | A_10_P026593      | CV079029       | 4.9                |
| 31 | A_10_P008993      | BC085209       | 4.9                |
| 32 | A_10_P023270      | CB943171       | 4.9                |
| 33 | A_10_P013846      | BJ059247       | 4.8                |
| 34 | A_10_P027342      | U76636         | 4.8                |
| 35 | A_10_P013071      | BI443557       | 4.6                |
| 36 | A_10_P006217      | BC074477       | 4.2                |
| 37 | A_10_P009256      | BC088671       | 4.1                |
| 38 | A_10_P005033      | BC072304       | 4.0                |
| 39 | A_10_P005166      | BC072818       | 4.0                |
| 40 | A_10_P005081      | BC072360       | 4.0                |
| 41 | A_10_P017110      | BP727251       | 4.0                |

**Supplemental Table S3:**

Genes significantly up-regulated in the presence of T3 alone in comparison to the untreated samples

|    |              |          |     |
|----|--------------|----------|-----|
| 42 | A_10_P007619 | BC080096 | 3.9 |
| 43 | A_10_P003399 | BC054947 | 3.8 |
| 44 | A_10_P003321 | BC054225 | 3.7 |
| 45 | A_10_P004957 | BC072220 | 3.6 |
| 46 | A_10_P016297 | BP687505 | 3.6 |
| 47 | A_10_P009194 | BC087471 | 3.6 |
| 48 | A_10_P023906 | CD300904 | 3.5 |
| 49 | A_10_P002628 | BC044030 | 3.5 |
| 50 | A_10_P007047 | BC077870 | 3.4 |
| 51 | A_10_P005155 | BC072806 | 3.4 |
| 52 | A_10_P002477 | BC043788 | 3.4 |
| 53 | A_10_P010027 | BE507589 | 3.4 |
| 54 | A_10_P027360 | U89265   | 3.3 |
| 55 | A_10_P007136 | BC077965 | 3.3 |
| 56 | A_10_P003954 | BC060751 | 3.2 |
| 57 | A_10_P013618 | BJ050186 | 3.1 |
| 58 | A_10_P027107 | M35362   | 3.1 |
| 59 | A_10_P025494 | CK796806 | 3.1 |
| 60 | A_10_P008416 | BC084127 | 3.1 |
| 61 | A_10_P006258 | BC075148 | 3.0 |
| 62 | A_10_P008083 | BC082472 | 2.9 |
| 63 | A_10_P016791 | BP708254 | 2.9 |
| 64 | A_10_P006216 | BC074476 | 2.9 |
| 65 | A_10_P027055 | L39213   | 2.8 |
| 66 | A_10_P006594 | BC077279 | 2.8 |
| 67 | A_10_P003990 | BC061680 | 2.8 |
| 68 | A_10_P002104 | AY573848 | 2.8 |
| 69 | A_10_P000540 | AF387815 | 2.8 |
| 70 | A_10_P023995 | CD302391 | 2.8 |
| 71 | A_10_P005695 | BC073488 | 2.8 |
| 72 | A_10_P000385 | AF187864 | 2.7 |
| 73 | A_10_P003156 | BC047254 | 2.7 |
| 74 | A_10_P003589 | BC056126 | 2.7 |
| 75 | A_10_P015575 | BJ635765 | 2.7 |
| 76 | A_10_P019869 | BX845344 | 2.7 |
| 77 | A_10_P006370 | BC076737 | 2.7 |
| 78 | A_10_P006483 | BC076858 | 2.6 |
| 79 | A_10_P012953 | BI314838 | 2.6 |
| 80 | A_10_P025385 | CK741953 | 2.6 |
| 81 | A_10_P004454 | BC070670 | 2.6 |
| 82 | A_10_P006288 | BC075182 | 2.6 |
| 83 | A_10_P008726 | BC084736 | 2.5 |
| 84 | A_10_P000425 | AF232672 | 2.5 |
| 85 | A_10_P027265 | U41858   | 2.5 |
| 86 | A_10_P024019 | CD303201 | 2.5 |
| 87 | A_10_P025241 | CF548599 | 2.5 |
| 88 | A_10_P008620 | BC084391 | 2.5 |

**Supplemental Table S3:**

Genes significantly up-regulated in the presence of T3 alone in comparison to the untreated samples

|     |              |          |     |
|-----|--------------|----------|-----|
| 89  | A_10_P000630 | AF549913 | 2.5 |
| 90  | A_10_P005564 | BC073337 | 2.5 |
| 91  | A_10_P003550 | BC056081 | 2.4 |
| 92  | A_10_P002758 | BC044329 | 2.4 |
| 93  | A_10_P002402 | BC042927 | 2.4 |
| 94  | A_10_P027261 | U41824   | 2.4 |
| 95  | A_10_P016499 | BP696237 | 2.4 |
| 96  | A_10_P002715 | BC044269 | 2.4 |
| 97  | A_10_P020645 | BX853527 | 2.4 |
| 98  | A_10_P006592 | BC077277 | 2.4 |
| 99  | A_10_P024350 | CD328137 | 2.4 |
| 100 | A_10_P017960 | BQ733202 | 2.4 |
| 101 | A_10_P000199 | AF001596 | 2.4 |
| 102 | A_10_P005312 | BC072996 | 2.4 |
| 103 | A_10_P012005 | BG234611 | 2.3 |
| 104 | A_10_P010359 | BC097726 | 2.3 |
| 105 | A_10_P003779 | BC059995 | 2.3 |
| 106 | A_10_P026197 | CN321906 | 2.3 |
| 107 | A_10_P003956 | BC060753 | 2.3 |
| 108 | A_10_P003500 | BC056020 | 2.3 |
| 109 | A_10_P002429 | BC043735 | 2.3 |
| 110 | A_10_P027198 | U12683   | 2.3 |
| 111 | A_10_P010244 | BE669221 | 2.3 |
| 112 | A_10_P007926 | BC081240 | 2.3 |
| 113 | A_10_P027271 | U42461   | 2.3 |
| 114 | A_10_P002921 | BC045209 | 2.3 |
| 115 | A_10_P001939 | AY043258 | 2.3 |
| 116 | A_10_P004259 | BC068899 | 2.3 |
| 117 | A_10_P006023 | BC074249 | 2.3 |
| 118 | A_10_P027535 | Z14997   | 2.3 |
| 119 | A_10_P024140 | CD325861 | 2.2 |
| 120 | A_10_P013963 | BJ067538 | 2.2 |
| 121 | A_10_P007081 | BC077905 | 2.2 |
| 122 | A_10_P003515 | BC056038 | 2.2 |
| 123 | A_10_P000172 | AB111446 | 2.2 |
| 124 | A_10_P007004 | BC077824 | 2.2 |
| 125 | A_10_P024731 | CD811314 | 2.2 |
| 126 | A_10_P025870 | CK800094 | 2.2 |
| 127 | A_10_P017576 | BQ399739 | 2.2 |
| 128 | A_10_P014195 | BJ077016 | 2.2 |
| 129 | A_10_P024567 | CD361341 | 2.2 |
| 130 | A_10_P006221 | BC074481 | 2.2 |
| 131 | A_10_P003688 | BC059296 | 2.2 |
| 132 | A_10_P004363 | BC070565 | 2.2 |
| 133 | A_10_P002918 | BC045132 | 2.2 |
| 134 | A_10_P016930 | BP716170 | 2.2 |
| 135 | A_10_P016419 | BP692999 | 2.2 |

**Supplemental Table S3:**

Genes significantly up-regulated in the presence of T3 alone in comparison to the untreated samples

|     |              |          |     |
|-----|--------------|----------|-----|
| 136 | A_10_P002908 | BC045120 | 2.2 |
| 137 | A_10_P007964 | BC081282 | 2.2 |
| 138 | A_10_P013856 | BJ060214 | 2.2 |
| 139 | A_10_P027039 | L20816   | 2.1 |
| 140 | A_10_P002618 | BC044016 | 2.1 |
| 141 | A_10_P007027 | BC077848 | 2.1 |
| 142 | A_10_P001945 | AY052629 | 2.1 |
| 143 | A_10_P002078 | AY484582 | 2.1 |
| 144 | A_10_P007667 | BC080392 | 2.1 |
| 145 | A_10_P002964 | BC045262 | 2.1 |
| 146 | A_10_P003807 | BC060027 | 2.1 |
| 147 | A_10_P006453 | BC076827 | 2.1 |
| 148 | A_10_P008495 | BC084257 | 2.1 |
| 149 | A_10_P006260 | BC075151 | 2.1 |
| 150 | A_10_P000471 | AF286645 | 2.1 |
| 151 | A_10_P004793 | BC071159 | 2.1 |
| 152 | A_10_P008853 | BC084886 | 2.1 |
| 153 | A_10_P025098 | CF520724 | 2.1 |
| 154 | A_10_P008819 | BC084848 | 2.1 |
| 155 | A_10_P003528 | BC056052 | 2.1 |
| 156 | A_10_P002470 | BC043779 | 2.1 |
| 157 | A_10_P009527 | BC090224 | 2.0 |
| 158 | A_10_P004623 | BC070859 | 2.0 |
| 159 | A_10_P002892 | BC045083 | 2.0 |
| 160 | A_10_P008385 | BC084089 | 2.0 |
| 161 | A_10_P024854 | CF284349 | 2.0 |
| 162 | A_10_P010384 | BF024854 | 2.0 |
| 163 | A_10_P026913 | CX135253 | 2.0 |
| 164 | A_10_P020615 | BX853254 | 2.0 |
| 165 | A_10_P003907 | BC060454 | 2.0 |
| 166 | A_10_P009074 | BC086634 | 2.0 |
| 167 | A_10_P004907 | BC072168 | 2.0 |
| 168 | A_10_P026964 | D83649   | 2.0 |
| 169 | A_10_P002641 | BC044046 | 2.0 |
| 170 | A_10_P005248 | BC072921 | 2.0 |
| 171 | A_10_P003272 | BC054150 | 2.0 |
| 172 | A_10_P008094 | BC082529 | 2.0 |
| 173 | A_10_P009688 | BE026509 | 2.0 |
| 174 | A_10_P004647 | BC070978 | 2.0 |
| 175 | A_10_P002850 | BC045027 | 2.0 |
| 176 | A_10_P024914 | CF286277 | 2.0 |
| 177 | A_10_P002046 | AY319522 | 2.0 |
| 178 | A_10_P006429 | BC076802 | 2.0 |
| 179 | A_10_P003385 | BC054306 | 2.0 |
| 180 | A_10_P003966 | BC061653 | 1.9 |
| 181 | A_10_P013942 | BJ066067 | 1.9 |
| 182 | A_10_P002552 | BC043887 | 1.9 |

**Supplemental Table S3:**

Genes significantly up-regulated in the presence of T3 alone in comparison to the untreated samples

|     |              |          |     |
|-----|--------------|----------|-----|
| 183 | A_10_P005916 | BC074120 | 1.9 |
| 184 | A_10_P018153 | BQ736298 | 1.9 |
| 185 | A_10_P016124 | BM928974 | 1.9 |
| 186 | A_10_P009362 | BC088952 | 1.9 |
| 187 | A_10_P015409 | BJ630946 | 1.9 |
| 188 | A_10_P011210 | BG019630 | 1.9 |
| 189 | A_10_P003224 | BC049287 | 1.9 |
| 190 | A_10_P008869 | BC084924 | 1.9 |
| 191 | A_10_P025160 | CF546899 | 1.9 |
| 192 | A_10_P011433 | BG022275 | 1.9 |
| 193 | A_10_P007778 | BC081080 | 1.9 |
| 194 | A_10_P002057 | AY344472 | 1.9 |
| 195 | A_10_P002112 | AY616034 | 1.9 |
| 196 | A_10_P005732 | BC073530 | 1.9 |
| 197 | A_10_P006142 | BC074390 | 1.9 |
| 198 | A_10_P004888 | BC072148 | 1.9 |
| 199 | A_10_P005701 | BC073494 | 1.9 |
| 200 | A_10_P006810 | BC077514 | 1.9 |
| 201 | A_10_P000141 | AB091339 | 1.9 |
| 202 | A_10_P003449 | BC055959 | 1.9 |
| 203 | A_10_P005131 | BC072769 | 1.9 |
| 204 | A_10_P006171 | BC074421 | 1.9 |
| 205 | A_10_P011032 | BF615812 | 1.9 |
| 206 | A_10_P002440 | BC043747 | 1.9 |
| 207 | A_10_P006590 | BC077275 | 1.9 |
| 208 | A_10_P005610 | BC073392 | 1.9 |
| 209 | A_10_P007857 | BC081167 | 1.9 |
| 210 | A_10_P004572 | BC070803 | 1.9 |
| 211 | A_10_P005521 | BC073282 | 1.9 |
| 212 | A_10_P023992 | CD302358 | 1.9 |
| 213 | A_10_P016193 | BP683833 | 1.9 |
| 214 | A_10_P008864 | BC084912 | 1.9 |
| 215 | A_10_P026981 | L01530   | 1.9 |
| 216 | A_10_P000313 | AF109923 | 1.8 |
| 217 | A_10_P013082 | BI444085 | 1.8 |
| 218 | A_10_P008772 | BC084792 | 1.8 |
| 219 | A_10_P017365 | BQ383574 | 1.8 |
| 220 | A_10_P005136 | BC072779 | 1.8 |
| 221 | A_10_P003526 | BC056049 | 1.8 |
| 222 | A_10_P007728 | BC081023 | 1.8 |
| 223 | A_10_P010702 | BF231908 | 1.8 |
| 224 | A_10_P027173 | U04707   | 1.8 |
| 225 | A_10_P024773 | CF271248 | 1.8 |
| 226 | A_10_P025528 | CK797077 | 1.8 |
| 227 | A_10_P004026 | BC063726 | 1.8 |
| 228 | A_10_P004984 | BC072252 | 1.8 |
| 229 | A_10_P002579 | BC043961 | 1.8 |

**Supplemental Table S3:**

Genes significantly up-regulated in the presence of T3 alone in comparison to the untreated samples

|     |              |          |     |
|-----|--------------|----------|-----|
| 230 | A_10_P003019 | BC046658 | 1.8 |
| 231 | A_10_P000059 | AB034701 | 1.8 |
| 232 | A_10_P020427 | BX851196 | 1.8 |
| 233 | A_10_P003788 | BC060008 | 1.8 |
| 234 | A_10_P002950 | BC045244 | 1.8 |
| 235 | A_10_P007067 | BC077891 | 1.8 |
| 236 | A_10_P006850 | BC077559 | 1.8 |
| 237 | A_10_P002323 | BC042235 | 1.8 |
| 238 | A_10_P000021 | AB015205 | 1.8 |
| 239 | A_10_P005611 | BC073393 | 1.8 |
| 240 | A_10_P000139 | AB087137 | 1.8 |
| 241 | A_10_P003472 | BC055989 | 1.8 |
| 242 | A_10_P003143 | BC046952 | 1.8 |
| 243 | A_10_P004154 | BC068760 | 1.8 |
| 244 | A_10_P008195 | BC082817 | 1.8 |
| 245 | A_10_P002760 | BC044332 | 1.8 |
| 246 | A_10_P008013 | BC082395 | 1.8 |
| 247 | A_10_P007833 | BC081140 | 1.8 |
| 248 | A_10_P020109 | BX847839 | 1.8 |
| 249 | A_10_P004277 | BC068920 | 1.8 |
| 250 | A_10_P004463 | BC070682 | 1.8 |
| 251 | A_10_P003028 | BC046669 | 1.8 |
| 252 | A_10_P024852 | CF284278 | 1.8 |
| 253 | A_10_P027221 | U24433   | 1.8 |
| 254 | A_10_P004823 | BC072056 | 1.7 |
| 255 | A_10_P003637 | BC057717 | 1.7 |
| 256 | A_10_P006545 | BC077221 | 1.7 |
| 257 | A_10_P000200 | AF002983 | 1.7 |
| 258 | A_10_P005086 | BC072365 | 1.7 |
| 259 | A_10_P011305 | BG020356 | 1.7 |
| 260 | A_10_P005626 | BC073409 | 1.7 |
| 261 | A_10_P014043 | BJ071217 | 1.7 |
| 262 | A_10_P009106 | BC087334 | 1.7 |
| 263 | A_10_P027556 | Z95080   | 1.7 |
| 264 | A_10_P006334 | BC075248 | 1.7 |
| 265 | A_10_P002560 | BC097543 | 1.7 |
| 266 | A_10_P013513 | BJ046441 | 1.7 |
| 267 | A_10_P000101 | AB060971 | 1.7 |
| 268 | A_10_P008257 | BC082892 | 1.7 |
| 269 | A_10_P009989 | BE506618 | 1.7 |
| 270 | A_10_P000495 | AF308810 | 1.7 |
| 271 | A_10_P000674 | AJ242680 | 1.7 |
| 272 | A_10_P003141 | BC046950 | 1.7 |
| 273 | A_10_P002080 | AY495962 | 1.7 |
| 274 | A_10_P008167 | BC082687 | 1.7 |
| 275 | A_10_P008885 | BC084941 | 1.7 |
| 276 | A_10_P020156 | BX848330 | 1.7 |

**Supplemental Table S3:**

Genes significantly up-regulated in the presence of T3 alone in comparison to the untreated samples

|     |              |          |     |
|-----|--------------|----------|-----|
| 277 | A_10_P025954 | CK800700 | 1.7 |
| 278 | A_10_P011421 | BG022174 | 1.7 |
| 279 | A_10_P008751 | BC084768 | 1.7 |
| 280 | A_10_P017831 | BQ731232 | 1.7 |
| 281 | A_10_P014009 | BJ069449 | 1.7 |
| 282 | A_10_P010812 | BF610679 | 1.7 |
| 283 | A_10_P006331 | BC094114 | 1.7 |
| 284 | A_10_P004182 | BC068792 | 1.7 |
| 285 | A_10_P021293 | CA972222 | 1.7 |
| 286 | A_10_P003316 | BC054220 | 1.7 |
| 287 | A_10_P023700 | CD255175 | 1.7 |
| 288 | A_10_P027411 | X56870   | 1.7 |
| 289 | A_10_P020535 | BX852372 | 1.7 |
| 290 | A_10_P000092 | AB048259 | 1.7 |
| 291 | A_10_P009223 | BC087516 | 1.7 |
| 292 | A_10_P005498 | BC073254 | 1.7 |
| 293 | A_10_P016127 | BM928982 | 1.7 |
| 294 | A_10_P016685 | BP704537 | 1.7 |
| 295 | A_10_P003029 | BC046670 | 1.7 |
| 296 | A_10_P007090 | BC077915 | 1.7 |
| 297 | A_10_P003581 | BC056117 | 1.7 |
| 298 | A_10_P021705 | CA983018 | 1.7 |
| 299 | A_10_P008643 | BC084419 | 1.7 |
| 300 | A_10_P007664 | BC080388 | 1.7 |
| 301 | A_10_P002017 | AY260733 | 1.7 |
| 302 | A_10_P009633 | BC092158 | 1.7 |
| 303 | A_10_P021257 | CA971660 | 1.7 |
| 304 | A_10_P006963 | BC077778 | 1.7 |
| 305 | A_10_P004381 | BC070590 | 1.7 |
| 306 | A_10_P023550 | CD253566 | 1.7 |
| 307 | A_10_P026203 | CN322629 | 1.7 |
| 308 | A_10_P010301 | BE679528 | 1.7 |
| 309 | A_10_P006422 | BC076795 | 1.7 |
| 310 | A_10_P010308 | BE679575 | 1.7 |
| 311 | A_10_P005776 | BC073590 | 1.7 |
| 312 | A_10_P008587 | BC084356 | 1.7 |
| 313 | A_10_P019850 | BX845111 | 1.6 |
| 314 | A_10_P004426 | BC070641 | 1.6 |
| 315 | A_10_P014145 | BJ075852 | 1.6 |
| 316 | A_10_P008916 | BC084972 | 1.6 |
| 317 | A_10_P005004 | BC072274 | 1.6 |
| 318 | A_10_P013229 | BI941475 | 1.6 |
| 319 | A_10_P007270 | BC078114 | 1.6 |
| 320 | A_10_P007444 | BC079769 | 1.6 |
| 321 | A_10_P023687 | CD254913 | 1.6 |
| 322 | A_10_P002032 | AY289193 | 1.6 |
| 323 | A_10_P013299 | BJ035117 | 1.6 |

**Supplemental Table S3:**

Genes significantly up-regulated in the presence of T3 alone in comparison to the untreated samples

|     |              |          |     |
|-----|--------------|----------|-----|
| 324 | A_10_P012074 | BG264723 | 1.6 |
| 325 | A_10_P002917 | BC045131 | 1.6 |
| 326 | A_10_P003069 | BC046716 | 1.6 |
| 327 | A_10_P006034 | BC074268 | 1.6 |
| 328 | A_10_P011647 | BG038309 | 1.6 |
| 329 | A_10_P010849 | BF611398 | 1.6 |
| 330 | A_10_P025857 | CK799975 | 1.6 |
| 331 | A_10_P005002 | BC072272 | 1.6 |
| 332 | A_10_P005536 | BC073301 | 1.6 |
| 333 | A_10_P008831 | BC084860 | 1.6 |
| 334 | A_10_P004207 | BC068819 | 1.6 |
| 335 | A_10_P000330 | AF139165 | 1.6 |
| 336 | A_10_P009136 | BC087383 | 1.6 |
| 337 | A_10_P001813 | AW766889 | 1.6 |
| 338 | A_10_P007941 | BC081256 | 1.6 |
| 339 | A_10_P008457 | BC084217 | 1.6 |
| 340 | A_10_P025693 | CK798599 | 1.6 |
| 341 | A_10_P023183 | CB756768 | 1.6 |
| 342 | A_10_P006168 | BC074418 | 1.6 |
| 343 | A_10_P027327 | U68059   | 1.6 |
| 344 | A_10_P005638 | BC073422 | 1.6 |
| 345 | A_10_P019781 | BX844253 | 1.6 |
| 346 | A_10_P006244 | BC075132 | 1.6 |
| 347 | A_10_P012991 | BI315530 | 1.6 |
| 348 | A_10_P003091 | BC046742 | 1.6 |
| 349 | A_10_P024921 | CF286639 | 1.6 |
| 350 | A_10_P010108 | BE508825 | 1.6 |
| 351 | A_10_P006788 | BC077489 | 1.6 |
| 352 | A_10_P007608 | BC080085 | 1.6 |
| 353 | A_10_P020366 | BX850461 | 1.6 |
| 354 | A_10_P007984 | BC082364 | 1.6 |
| 355 | A_10_P016129 | BM928998 | 1.6 |
| 356 | A_10_P006581 | BC077264 | 1.6 |
| 357 | A_10_P000041 | AB026192 | 1.6 |
| 358 | A_10_P023452 | CD101039 | 1.6 |
| 359 | A_10_P024892 | CF285540 | 1.6 |
| 360 | A_10_P002626 | BC044027 | 1.6 |
| 361 | A_10_P014111 | BJ074424 | 1.6 |
| 362 | A_10_P006064 | BC074306 | 1.6 |
| 363 | A_10_P006018 | BC074243 | 1.6 |
| 364 | A_10_P007841 | BC081151 | 1.6 |
| 365 | A_10_P020477 | BX851652 | 1.6 |
| 366 | A_10_P010305 | BE679557 | 1.6 |
| 367 | A_10_P027412 | X57165   | 1.6 |
| 368 | A_10_P019747 | BX843827 | 1.6 |
| 369 | A_10_P000068 | AB037936 | 1.6 |
| 370 | A_10_P007865 | BC081175 | 1.6 |



**Supplemental Table S3:**

Genes significantly up-regulated in the presence of T3 alone in comparison to the untreated samples

|     |              |          |     |
|-----|--------------|----------|-----|
| 371 | A_10_P009066 | BC086475 | 1.6 |
| 372 | A_10_P020579 | BC099008 | 1.6 |
| 373 | A_10_P025605 | CK797783 | 1.6 |
| 374 | A_10_P026926 | CX135575 | 1.6 |
| 375 | A_10_P027487 | X92872   | 1.6 |
| 376 | A_10_P003912 | BC060459 | 1.6 |
| 377 | A_10_P003107 | BC046850 | 1.6 |
| 378 | A_10_P008608 | BC084379 | 1.6 |
| 379 | A_10_P002472 | BC043782 | 1.6 |
| 380 | A_10_P007520 | BC079987 | 1.6 |
| 381 | A_10_P027246 | U35408   | 1.6 |
| 382 | A_10_P002537 | BC043868 | 1.6 |
| 383 | A_10_P007033 | BC077854 | 1.6 |
| 384 | A_10_P002920 | BC045134 | 1.5 |
| 385 | A_10_P000721 | BC098974 | 1.5 |
| 386 | A_10_P004604 | BC070838 | 1.5 |
| 387 | A_10_P004662 | BC070999 | 1.5 |
| 388 | A_10_P006019 | BC074244 | 1.5 |
| 389 | A_10_P002980 | BC046257 | 1.5 |
| 390 | A_10_P008245 | BC097583 | 1.5 |
| 391 | A_10_P002372 | BC042309 | 1.5 |
| 392 | A_10_P020613 | BX853225 | 1.5 |
| 393 | A_10_P003072 | BC046719 | 1.5 |
| 394 | A_10_P004739 | BC071097 | 1.5 |
| 395 | A_10_P003116 | BC046859 | 1.5 |
| 396 | A_10_P019985 | BX846575 | 1.5 |
| 397 | A_10_P002274 | BC041721 | 1.5 |
| 398 | A_10_P003856 | BC060396 | 1.5 |
| 399 | A_10_P020219 | BX848996 | 1.5 |
| 400 | A_10_P025326 | CK740717 | 1.5 |
| 401 | A_10_P006842 | BC077551 | 1.5 |
| 402 | A_10_P020383 | BX850674 | 1.5 |
| 403 | A_10_P000486 | AF302765 | 1.5 |
| 404 | A_10_P007959 | BC081276 | 1.5 |
| 405 | A_10_P003925 | BC060476 | 1.5 |
| 406 | A_10_P007951 | BC081268 | 1.5 |
| 407 | A_10_P027230 | U26404   | 1.5 |
| 408 | A_10_P006105 | BC074353 | 1.5 |
| 409 | A_10_P025572 | CK797468 | 1.5 |
| 410 | A_10_P004515 | BC070743 | 1.5 |
| 411 | A_10_P004456 | BC070672 | 1.5 |
| 412 | A_10_P004902 | BC072163 | 1.5 |
| 413 | A_10_P006913 | BC077625 | 1.5 |
| 414 | A_10_P027415 | X57675   | 1.5 |
| 415 | A_10_P009741 | BE131768 | 1.5 |
| 416 | A_10_P005291 | BC072973 | 1.5 |
| 417 | A_10_P009085 | BC087304 | 1.5 |

**Supplemental Table S3:**

Genes significantly up-regulated in the presence of T3 alone in comparison to the untreated samples

|     |              |          |     |
|-----|--------------|----------|-----|
| 418 | A_10_P027264 | U41856   | 1.5 |
| 419 | A_10_P004175 | BC068782 | 1.5 |
| 420 | A_10_P027432 | X63424   | 1.5 |
| 421 | A_10_P000740 | AJ507633 | 1.5 |
| 422 | A_10_P027321 | U67078   | 1.5 |
| 423 | A_10_P006575 | BC077253 | 1.5 |
| 424 | A_10_P025696 | CK798617 | 1.5 |
| 425 | A_10_P004452 | BC070668 | 1.5 |
| 426 | A_10_P015971 | BM180847 | 1.5 |
| 427 | A_10_P002761 | BC044333 | 1.5 |
| 428 | A_10_P021280 | CA971914 | 1.5 |
| 429 | A_10_P007295 | BC078467 | 1.5 |
| 430 | A_10_P000002 | AB001073 | 1.5 |
| 431 | A_10_P005702 | BC073495 | 1.5 |
| 432 | A_10_P011639 | BG038211 | 1.5 |
| 433 | A_10_P004406 | BC070620 | 1.5 |
| 434 | A_10_P012034 | BG264321 | 1.5 |
| 435 | A_10_P002992 | BC046270 | 1.5 |
| 436 | A_10_P002302 | BC041753 | 1.5 |
| 437 | A_10_P003650 | BC057732 | 1.5 |
| 438 | A_10_P003223 | BC049177 | 1.5 |
| 439 | A_10_P003775 | BC059991 | 1.5 |
| 440 | A_10_P026942 | D14400   | 1.5 |
| 441 | A_10_P010233 | BE576731 | 1.5 |
| 442 | A_10_P002687 | BC044107 | 1.5 |
| 443 | A_10_P009521 | BC090217 | 1.5 |
| 444 | A_10_P027450 | X68683   | 1.5 |
| 445 | A_10_P007100 | BC077925 | 1.5 |
| 446 | A_10_P005307 | BC072991 | 1.5 |
| 447 | A_10_P027445 | X65943   | 1.5 |
| 448 | A_10_P002162 | AY913768 | 1.5 |
| 449 | A_10_P007131 | BC077960 | 1.5 |
| 450 | A_10_P004260 | BC068900 | 1.5 |
| 451 | A_10_P003689 | BC059297 | 1.5 |
| 452 | A_10_P006372 | BC076739 | 1.5 |
| 453 | A_10_P002987 | BC046264 | 1.5 |
| 454 | A_10_P006408 | BC076779 | 1.5 |
| 455 | A_10_P024371 | CD328493 | 1.5 |
| 456 | A_10_P004278 | BC068922 | 1.5 |
| 457 | A_10_P020101 | BX847771 | 1.5 |
| 458 | A_10_P005198 | BC072861 | 1.5 |
| 459 | A_10_P026945 | D29796   | 1.5 |
| 460 | A_10_P002635 | BC044038 | 1.5 |
| 461 | A_10_P007913 | BC081227 | 1.5 |
| 462 | A_10_P007284 | BC078128 | 1.5 |
| 463 | A_10_P012460 | BG553365 | 1.5 |
| 464 | A_10_P007815 | BC081121 | 1.5 |

**Supplemental Table S3:**

Genes significantly up-regulated in the presence of T3 alone in comparison to the untreated samples

|     |              |          |     |
|-----|--------------|----------|-----|
| 465 | A_10_P000137 | AB086020 | 1.5 |
| 466 | A_10_P006886 | BC077597 | 1.5 |
| 467 | A_10_P007057 | BC077880 | 1.5 |
| 468 | A_10_P000653 | AJ010497 | 1.5 |
| 469 | A_10_P024284 | CD327200 | 1.5 |
| 470 | A_10_P013293 | BJ034725 | 1.5 |
| 471 | A_10_P023432 | CD100271 | 1.5 |
| 472 | A_10_P019915 | BX845902 | 1.5 |
| 473 | A_10_P007032 | BC077853 | 1.5 |
| 474 | A_10_P005065 | BC072341 | 1.5 |
| 475 | A_10_P016548 | BP698716 | 1.5 |
| 476 | A_10_P000755 | AJ605777 | 1.5 |
| 477 | A_10_P012287 | BG439844 | 1.5 |
| 478 | A_10_P004883 | BC072142 | 1.4 |
| 479 | A_10_P009474 | BC089285 | 1.4 |
| 480 | A_10_P008279 | BC082920 | 1.4 |
| 481 | A_10_P006308 | BC075217 | 1.4 |
| 482 | A_10_P008714 | BC084662 | 1.4 |
| 483 | A_10_P008456 | BC084216 | 1.4 |
| 484 | A_10_P002025 | AY278679 | 1.4 |
| 485 | A_10_P016522 | BP697688 | 1.4 |
| 486 | A_10_P007112 | BC077938 | 1.4 |
| 487 | A_10_P006227 | BC074488 | 1.4 |
| 488 | A_10_P003276 | BC054155 | 1.4 |
| 489 | A_10_P020170 | BX848455 | 1.4 |
| 490 | A_10_P007759 | BC081059 | 1.4 |
| 491 | A_10_P004826 | BC072059 | 1.4 |
| 492 | A_10_P009337 | BC088919 | 1.4 |
| 493 | A_10_P002702 | BC044123 | 1.4 |
| 494 | A_10_P004233 | BC068847 | 1.4 |
| 495 | A_10_P020151 | BX848252 | 1.4 |
| 496 | A_10_P005396 | BC073096 | 1.4 |
| 497 | A_10_P019644 | BX842722 | 1.4 |
| 498 | A_10_P004570 | BC070801 | 1.4 |
| 499 | A_10_P003249 | BC053786 | 1.4 |
| 500 | A_10_P002410 | BC043623 | 1.4 |
| 501 | A_10_P011898 | BG162643 | 1.4 |
| 502 | A_10_P000620 | AF549892 | 1.4 |
| 503 | A_10_P007556 | BC080025 | 1.4 |
| 504 | A_10_P003888 | BC060430 | 1.4 |
| 505 | A_10_P005746 | BC073550 | 1.4 |
| 506 | A_10_P006405 | BC076776 | 1.4 |
| 507 | A_10_P003638 | BC057719 | 1.4 |
| 508 | A_10_P000194 | AB191720 | 1.4 |
| 509 | A_10_P016457 | BP694403 | 1.4 |
| 510 | A_10_P027372 | U95104   | 1.4 |
| 511 | A_10_P012367 | BG513927 | 1.4 |

**Supplemental Table S3:**

Genes significantly up-regulated in the presence of T3 alone in comparison to the untreated samples

|     |              |          |     |
|-----|--------------|----------|-----|
| 512 | A_10_P005493 | BC073249 | 1.4 |
| 513 | A_10_P005630 | BC073413 | 1.4 |
| 514 | A_10_P005917 | BC074121 | 1.4 |
| 515 | A_10_P004698 | BC071040 | 1.4 |
| 516 | A_10_P027533 | Z14122   | 1.4 |
| 517 | A_10_P001390 | AW200278 | 1.4 |
| 518 | A_10_P008634 | BC084408 | 1.4 |
| 519 | A_10_P009007 | BC085223 | 1.4 |
| 520 | A_10_P007597 | BC080072 | 1.4 |
| 521 | A_10_P005150 | BC072800 | 1.4 |
| 522 | A_10_P026573 | CV076884 | 1.4 |
| 523 | A_10_P006026 | BC074252 | 1.4 |
| 524 | A_10_P010606 | BF072033 | 1.4 |
| 525 | A_10_P005806 | BC073628 | 1.4 |
| 526 | A_10_P019661 | BX842912 | 1.4 |
| 527 | A_10_P015849 | BJ643003 | 1.4 |
| 528 | A_10_P005785 | BC073603 | 1.4 |
| 529 | A_10_P009263 | BC088682 | 1.4 |
| 530 | A_10_P008439 | BC084198 | 1.4 |
| 531 | A_10_P020384 | BX850685 | 1.4 |
| 532 | A_10_P005829 | BC073659 | 1.4 |
| 533 | A_10_P005290 | BC072971 | 1.4 |
| 534 | A_10_P013276 | BJ032910 | 1.4 |
| 535 | A_10_P006161 | BC074410 | 1.4 |
| 536 | A_10_P012580 | BG730432 | 1.4 |
| 537 | A_10_P000521 | AF351126 | 1.4 |
| 538 | A_10_P002141 | AY762376 | 1.4 |
| 539 | A_10_P006601 | BC077286 | 1.4 |
| 540 | A_10_P015853 | BJ643128 | 1.4 |
| 541 | A_10_P009532 | BC090231 | 1.4 |
| 542 | A_10_P011695 | BG160184 | 1.4 |
| 543 | A_10_P002774 | BC044689 | 1.4 |
| 544 | A_10_P000093 | AB049354 | 1.4 |
| 545 | A_10_P024211 | CD326486 | 1.4 |
| 546 | A_10_P006077 | BC074321 | 1.4 |
| 547 | A_10_P004137 | BC068743 | 1.4 |
| 548 | A_10_P000242 | AF044080 | 1.4 |
| 549 | A_10_P004347 | BC070543 | 1.4 |
| 550 | A_10_P025867 | CK800055 | 1.4 |
| 551 | A_10_P014239 | BJ077953 | 1.4 |
| 552 | A_10_P000112 | AB070723 | 1.4 |
| 553 | A_10_P001253 | BC099031 | 1.4 |
| 554 | A_10_P015055 | BJ612498 | 1.4 |
| 555 | A_10_P004125 | BC068726 | 1.4 |
| 556 | A_10_P008617 | BC084388 | 1.4 |
| 557 | A_10_P001632 | AW639557 | 1.4 |
| 558 | A_10_P002871 | BC045050 | 1.4 |

**Supplemental Table S3:**

Genes significantly up-regulated in the presence of T3 alone in comparison to the untreated samples

|     |              |          |     |
|-----|--------------|----------|-----|
| 559 | A_10_P008099 | BC082614 | 1.4 |
| 560 | A_10_P020571 | BX852824 | 1.4 |
| 561 | A_10_P009020 | BC086271 | 1.4 |
| 562 | A_10_P009396 | BC089131 | 1.4 |
| 563 | A_10_P002766 | BC044675 | 1.4 |
| 564 | A_10_P020516 | BX852098 | 1.4 |
| 565 | A_10_P000715 | AJ311602 | 1.4 |
| 566 | A_10_P003535 | BC056059 | 1.4 |
| 567 | A_10_P027232 | U27842   | 1.4 |
| 568 | A_10_P006135 | BC074383 | 1.4 |
| 569 | A_10_P025644 | CK798118 | 1.4 |
| 570 | A_10_P007291 | BC078136 | 1.4 |
| 571 | A_10_P027322 | U67129   | 1.4 |
| 572 | A_10_P003603 | BC056842 | 1.4 |
| 573 | A_10_P020527 | BX852260 | 1.4 |
| 574 | A_10_P003765 | BC059981 | 1.4 |
| 575 | A_10_P007485 | BC079817 | 1.4 |
| 576 | A_10_P012612 | BG731491 | 1.4 |
| 577 | A_10_P002306 | BC041758 | 1.4 |
| 578 | A_10_P008392 | BC084098 | 1.4 |
| 579 | A_10_P006056 | BC074296 | 1.4 |
| 580 | A_10_P024937 | CF287379 | 1.4 |
| 581 | A_10_P025458 | CK796526 | 1.4 |
| 582 | A_10_P019776 | BX844173 | 1.4 |
| 583 | A_10_P009549 | BC090252 | 1.4 |
| 584 | A_10_P015748 | BJ640299 | 1.4 |
| 585 | A_10_P005508 | BC073267 | 1.4 |
| 586 | A_10_P003442 | BC054997 | 1.4 |
| 587 | A_10_P004878 | BC072132 | 1.4 |
| 588 | A_10_P003034 | BC046675 | 1.4 |
| 589 | A_10_P000152 | AB093560 | 1.4 |
| 590 | A_10_P008783 | BC084803 | 1.4 |
| 591 | A_10_P016688 | BP704578 | 1.4 |
| 592 | A_10_P004015 | BC063273 | 1.4 |
| 593 | A_10_P009323 | BC088903 | 1.4 |
| 594 | A_10_P008570 | BC084339 | 1.4 |
| 595 | A_10_P003277 | BC054158 | 1.4 |
| 596 | A_10_P026605 | CV080234 | 1.4 |
| 597 | A_10_P005629 | BC073412 | 1.4 |
| 598 | A_10_P007237 | BC078077 | 1.4 |
| 599 | A_10_P007359 | BC078612 | 1.4 |
| 600 | A_10_P026606 | CV080315 | 1.4 |
| 601 | A_10_P008269 | BC082905 | 1.4 |
| 602 | A_10_P024554 | CD361114 | 1.4 |
| 603 | A_10_P009140 | BC087391 | 1.4 |
| 604 | A_10_P004094 | BC068688 | 1.3 |
| 605 | A_10_P002759 | BC044330 | 1.3 |

**Supplemental Table S3:**

Genes significantly up-regulated in the presence of T3 alone in comparison to the untreated samples

|     |              |          |     |
|-----|--------------|----------|-----|
| 606 | A_10_P003518 | BC056041 | 1.3 |
| 607 | A_10_P020560 | BX852606 | 1.3 |
| 608 | A_10_P002178 | BC041207 | 1.3 |
| 609 | A_10_P008792 | BC084814 | 1.3 |
| 610 | A_10_P013920 | BJ064261 | 1.3 |
| 611 | A_10_P007552 | BC080021 | 1.3 |
| 612 | A_10_P006147 | BC074395 | 1.3 |
| 613 | A_10_P003369 | BC054285 | 1.3 |
| 614 | A_10_P007673 | BC080402 | 1.3 |
| 615 | A_10_P008777 | BC084797 | 1.3 |
| 616 | A_10_P014625 | BJ086619 | 1.3 |
| 617 | A_10_P003755 | BC059970 | 1.3 |
| 618 | A_10_P001621 | AW638861 | 1.3 |
| 619 | A_10_P008424 | BC084138 | 1.3 |
| 620 | A_10_P024337 | CD327946 | 1.3 |
| 621 | A_10_P025122 | CF521731 | 1.3 |
| 622 | A_10_P003524 | BC056047 | 1.3 |
| 623 | A_10_P004032 | BC063732 | 1.3 |
| 624 | A_10_P020079 | BX847580 | 1.3 |
| 625 | A_10_P009524 | BC090221 | 1.3 |
| 626 | A_10_P006223 | BC074483 | 1.3 |
| 627 | A_10_P006600 | BC077285 | 1.3 |
| 628 | A_10_P005578 | BC073353 | 1.3 |
| 629 | A_10_P007073 | BC077897 | 1.3 |
| 630 | A_10_P006934 | BC077740 | 1.3 |
| 631 | A_10_P027307 | U60643   | 1.3 |
| 632 | A_10_P001382 | AW200252 | 1.3 |
| 633 | A_10_P004987 | BC072257 | 1.3 |
| 634 | A_10_P027401 | X52692   | 1.3 |
| 635 | A_10_P005143 | BC072787 | 1.3 |
| 636 | A_10_P025549 | CK797267 | 1.3 |
| 637 | A_10_P003198 | BC048020 | 1.3 |
| 638 | A_10_P011914 | BG163049 | 1.3 |
| 639 | A_10_P007335 | BC078571 | 1.3 |
| 640 | A_10_P006082 | BC074326 | 1.3 |
| 641 | A_10_P006602 | BC077287 | 1.3 |
| 642 | A_10_P008217 | BC082845 | 1.3 |
| 643 | A_10_P005859 | BC073695 | 1.3 |
| 644 | A_10_P008096 | BC082531 | 1.3 |
| 645 | A_10_P016655 | BP703429 | 1.3 |
| 646 | A_10_P003527 | BC056051 | 1.3 |
| 647 | A_10_P009520 | BC090216 | 1.3 |
| 648 | A_10_P003288 | BC054180 | 1.3 |
| 649 | A_10_P024748 | CF270416 | 1.3 |
| 650 | A_10_P004943 | BC072206 | 1.3 |
| 651 | A_10_P002330 | BC042247 | 1.3 |
| 652 | A_10_P003596 | BC056134 | 1.3 |

**Supplemental Table S3:**

Genes significantly up-regulated in the presence of T3 alone in comparison to the untreated samples

|     |              |          |     |
|-----|--------------|----------|-----|
| 653 | A_10_P024928 | CF286923 | 1.3 |
| 654 | A_10_P011043 | BG016265 | 1.3 |
| 655 | A_10_P001788 | AW766084 | 1.3 |
| 656 | A_10_P008847 | BC084880 | 1.3 |
| 657 | A_10_P026949 | D32066   | 1.3 |
| 658 | A_10_P024444 | CD329717 | 1.3 |
| 659 | A_10_P008780 | BC084800 | 1.3 |
| 660 | A_10_P003984 | BC061673 | 1.3 |
| 661 | A_10_P004465 | BC070684 | 1.3 |
| 662 | A_10_P012569 | BG656590 | 1.3 |
| 663 | A_10_P015279 | BJ627001 | 1.3 |
| 664 | A_10_P000778 | AW147393 | 1.3 |
| 665 | A_10_P003643 | BC057724 | 1.3 |
| 666 | A_10_P020655 | BX853616 | 1.3 |
| 667 | A_10_P003628 | BC057704 | 1.3 |
| 668 | A_10_P000226 | AF032118 | 1.3 |
| 669 | A_10_P003132 | BC046940 | 1.3 |
| 670 | A_10_P007613 | BC080090 | 1.3 |
| 671 | A_10_P006969 | BC077785 | 1.3 |
| 672 | A_10_P008563 | BC084332 | 1.3 |
| 673 | A_10_P002442 | BC043749 | 1.3 |
| 674 | A_10_P007565 | BC080034 | 1.3 |
| 675 | A_10_P002931 | BC045220 | 1.3 |
| 676 | A_10_P002343 | BC042267 | 1.3 |
| 677 | A_10_P003709 | BC059318 | 1.3 |
| 678 | A_10_P002261 | BC041520 | 1.3 |
| 679 | A_10_P027463 | BC097600 | 1.3 |
| 680 | A_10_P008769 | BC084788 | 1.3 |
| 681 | A_10_P001868 | AW768051 | 1.3 |
| 682 | A_10_P008165 | BC082685 | 1.3 |
| 683 | A_10_P003944 | BC060497 | 1.3 |
| 684 | A_10_P005222 | BC072890 | 1.3 |
| 685 | A_10_P002959 | BC045253 | 1.3 |
| 686 | A_10_P026977 | J05180   | 1.3 |
| 687 | A_10_P021476 | CA974505 | 1.3 |
| 688 | A_10_P005162 | BC072814 | 1.3 |
| 689 | A_10_P004011 | BC061947 | 1.3 |
| 690 | A_10_P008791 | BC084811 | 1.3 |
| 691 | A_10_P006676 | BC077363 | 1.3 |
| 692 | A_10_P008378 | BC084082 | 1.3 |
| 693 | A_10_P023350 | CB983966 | 1.3 |
| 694 | A_10_P006845 | BC077554 | 1.3 |
| 695 | A_10_P011003 | BF615307 | 1.3 |
| 696 | A_10_P004674 | BC071011 | 1.3 |
| 697 | A_10_P019954 | BX846232 | 1.3 |
| 698 | A_10_P004706 | BC071048 | 1.3 |
| 699 | A_10_P002754 | BC044323 | 1.3 |

**Supplemental Table S3:**

Genes significantly up-regulated in the presence of T3 alone in comparison to the untreated samples

|     |              |          |     |
|-----|--------------|----------|-----|
| 700 | A_10_P006347 | BC076645 | 1.3 |
| 701 | A_10_P013046 | BI442485 | 1.3 |
| 702 | A_10_P022924 | CB564703 | 1.3 |
| 703 | A_10_P003220 | BC049174 | 1.3 |
| 704 | A_10_P014864 | BJ092479 | 1.3 |
| 705 | A_10_P023405 | CD099389 | 1.3 |
| 706 | A_10_P007264 | BC078108 | 1.3 |
| 707 | A_10_P000433 | AF244359 | 1.3 |
| 708 | A_10_P013939 | BJ065916 | 1.3 |
| 709 | A_10_P025058 | CF342039 | 1.3 |
| 710 | A_10_P003711 | BC059320 | 1.3 |
| 711 | A_10_P003681 | BC059288 | 1.3 |
| 712 | A_10_P007580 | BC080054 | 1.3 |
| 713 | A_10_P007368 | BC079681 | 1.3 |
| 714 | A_10_P003349 | BC054257 | 1.3 |
| 715 | A_10_P020665 | BX853762 | 1.3 |
| 716 | A_10_P024500 | CD360533 | 1.3 |
| 717 | A_10_P003920 | BC060469 | 1.3 |
| 718 | A_10_P004519 | BC070747 | 1.3 |
| 719 | A_10_P005788 | BC073606 | 1.3 |
| 720 | A_10_P009243 | BC087549 | 1.3 |
| 721 | A_10_P008639 | BC084414 | 1.3 |
| 722 | A_10_P009096 | BC087320 | 1.3 |
| 723 | A_10_P002865 | BC045044 | 1.3 |
| 724 | A_10_P008070 | BC082457 | 1.3 |
| 725 | A_10_P006929 | BC077701 | 1.3 |
| 726 | A_10_P003914 | BC060461 | 1.3 |
| 727 | A_10_P003740 | BC059352 | 1.3 |
| 728 | A_10_P010739 | BF232529 | 1.3 |
| 729 | A_10_P001280 | AW199751 | 1.3 |
| 730 | A_10_P003554 | BC056085 | 1.3 |
| 731 | A_10_P012561 | BG579849 | 1.3 |
| 732 | A_10_P009599 | BC092027 | 1.3 |
| 733 | A_10_P002743 | BC044312 | 1.3 |
| 734 | A_10_P006928 | BC098966 | 1.3 |
| 735 | A_10_P020060 | BX847376 | 1.3 |
| 736 | A_10_P020208 | BX848883 | 1.3 |
| 737 | A_10_P000409 | AF212298 | 1.3 |
| 738 | A_10_P003662 | BC057746 | 1.3 |
| 739 | A_10_P020296 | BX849724 | 1.3 |
| 740 | A_10_P026969 | D87209   | 1.3 |
| 741 | A_10_P013922 | BJ064568 | 1.3 |
| 742 | A_10_P016607 | BP701259 | 1.3 |
| 743 | A_10_P007440 | BC079763 | 1.3 |
| 744 | A_10_P002399 | BC042359 | 1.3 |
| 745 | A_10_P001306 | AW199868 | 1.3 |
| 746 | A_10_P006939 | BC077745 | 1.3 |



**Supplemental Table S3:**

Genes significantly up-regulated in the presence of T3 alone in comparison to the untreated samples

|     |              |          |     |
|-----|--------------|----------|-----|
| 747 | A_10_P004065 | BC068647 | 1.3 |
| 748 | A_10_P004286 | BC068930 | 1.3 |
| 749 | A_10_P025256 | CF548888 | 1.3 |
| 750 | A_10_P026139 | CK807104 | 1.3 |
| 751 | A_10_P002747 | BC044316 | 1.3 |
| 752 | A_10_P016954 | BP717767 | 1.3 |
| 753 | A_10_P021750 | CA983533 | 1.3 |
| 754 | A_10_P005517 | BC073276 | 1.3 |
| 755 | A_10_P005742 | BC073545 | 1.3 |
| 756 | A_10_P008635 | BC084409 | 1.3 |
| 757 | A_10_P025508 | CK796914 | 1.3 |
| 758 | A_10_P003657 | BC057739 | 1.3 |
| 759 | A_10_P002738 | BC097784 | 1.3 |
| 760 | A_10_P013858 | BJ060417 | 1.3 |
| 761 | A_10_P007693 | BC080437 | 1.3 |
| 762 | A_10_P027317 | U65897   | 1.3 |
| 763 | A_10_P005488 | BC073243 | 1.3 |
| 764 | A_10_P009051 | BC086459 | 1.3 |
| 765 | A_10_P005036 | BC072308 | 1.3 |
| 766 | A_10_P008047 | BC082432 | 1.3 |
| 767 | A_10_P001683 | AW642902 | 1.3 |
| 768 | A_10_P020765 | BX854874 | 1.3 |
| 769 | A_10_P004675 | BC071012 | 1.3 |
| 770 | A_10_P016262 | BP686437 | 1.3 |
| 771 | A_10_P004887 | BC072147 | 1.3 |
| 772 | A_10_P007775 | BC081076 | 1.2 |
| 773 | A_10_P025175 | CF547537 | 1.2 |
| 774 | A_10_P025849 | CK799919 | 1.2 |
| 775 | A_10_P007268 | BC078112 | 1.2 |
| 776 | A_10_P007622 | BC080099 | 1.2 |
| 777 | A_10_P008967 | BC085063 | 1.2 |
| 778 | A_10_P027346 | U77639   | 1.2 |
| 779 | A_10_P012298 | BG486020 | 1.2 |
| 780 | A_10_P002962 | BC045260 | 1.2 |
| 781 | A_10_P009111 | BC087341 | 1.2 |
| 782 | A_10_P007326 | BC078557 | 1.2 |
| 783 | A_10_P008098 | BC082612 | 1.2 |
| 784 | A_10_P002788 | BC044711 | 1.2 |
| 785 | A_10_P006099 | BC074347 | 1.2 |
| 786 | A_10_P008299 | BC082944 | 1.2 |
| 787 | A_10_P001409 | AW200467 | 1.2 |
| 788 | A_10_P025986 | CK803866 | 1.2 |
| 789 | A_10_P001363 | AW200150 | 1.2 |
| 790 | A_10_P008768 | BC084787 | 1.2 |
| 791 | A_10_P009522 | BC090218 | 1.2 |
| 792 | A_10_P002794 | BC044956 | 1.2 |
| 793 | A_10_P004714 | BC071059 | 1.2 |

**Supplemental Table S3:**

Genes significantly up-regulated in the presence of T3 alone in comparison to the untreated samples

|     |              |          |     |
|-----|--------------|----------|-----|
| 794 | A_10_P025621 | CK797924 | 1.2 |
| 795 | A_10_P002191 | BC041228 | 1.2 |
| 796 | A_10_P000049 | AB030443 | 1.2 |
| 797 | A_10_P008673 | BC084611 | 1.2 |
| 798 | A_10_P005329 | BC073017 | 1.2 |
| 799 | A_10_P001858 | AW767915 | 1.2 |
| 800 | A_10_P007662 | BC080386 | 1.2 |
| 801 | A_10_P006360 | BC076727 | 1.2 |
| 802 | A_10_P009493 | BC090159 | 1.2 |
| 803 | A_10_P009626 | BC092127 | 1.2 |
| 804 | A_10_P003564 | BC056097 | 1.2 |
| 805 | A_10_P023333 | CB945344 | 1.2 |
| 806 | A_10_P019809 | BX844538 | 1.2 |
| 807 | A_10_P002015 | AY256967 | 1.2 |
| 808 | A_10_P003728 | BC059337 | 1.2 |
| 809 | A_10_P009424 | BC089173 | 1.2 |
| 810 | A_10_P016972 | BP718439 | 1.2 |
| 811 | A_10_P008162 | BC082682 | 1.2 |
| 812 | A_10_P002204 | BC041248 | 1.2 |
| 813 | A_10_P009049 | BC086314 | 1.2 |
| 814 | A_10_P021643 | CA982484 | 1.2 |
| 815 | A_10_P002960 | BC045258 | 1.2 |
| 816 | A_10_P002809 | BC044977 | 1.2 |
| 817 | A_10_P004458 | BC070675 | 1.2 |
| 818 | A_10_P007850 | BC081160 | 1.2 |
| 819 | A_10_P004966 | BC072231 | 1.2 |
| 820 | A_10_P001377 | AW200218 | 1.2 |
| 821 | A_10_P006058 | BC074298 | 1.2 |
| 822 | A_10_P008086 | BC082475 | 1.2 |
| 823 | A_10_P009463 | BC089272 | 1.2 |
| 824 | A_10_P006858 | BC077567 | 1.2 |
| 825 | A_10_P025191 | CF547820 | 1.2 |
| 826 | A_10_P002390 | BC042348 | 1.2 |
| 827 | A_10_P007539 | BC080006 | 1.2 |
| 828 | A_10_P000376 | BC097547 | 1.2 |
| 829 | A_10_P003433 | BC054988 | 1.2 |
| 830 | A_10_P006324 | BC075237 | 1.2 |
| 831 | A_10_P008497 | BC084260 | 1.2 |
| 832 | A_10_P012429 | BG552075 | 1.2 |
| 833 | A_10_P004356 | BC070558 | 1.2 |
| 834 | A_10_P002613 | BC044009 | 1.2 |
| 835 | A_10_P008530 | BC084295 | 1.2 |
| 836 | A_10_P011864 | BG162022 | 1.2 |
| 837 | A_10_P020172 | BX848480 | 1.2 |
| 838 | A_10_P020437 | BX851320 | 1.2 |
| 839 | A_10_P008406 | BC084114 | 1.2 |
| 840 | A_10_P019726 | BX843577 | 1.2 |

**Supplemental Table S3:**

Genes significantly up-regulated in the presence of T3 alone in comparison to the untreated samples

|     |              |          |     |
|-----|--------------|----------|-----|
| 841 | A_10_P006655 | BC077340 | 1.2 |
| 842 | A_10_P009346 | BC088933 | 1.2 |
| 843 | A_10_P007479 | BC079811 | 1.2 |
| 844 | A_10_P013907 | BJ063234 | 1.2 |
| 845 | A_10_P012221 | BG438691 | 1.2 |
| 846 | A_10_P012178 | BG371367 | 1.2 |
| 847 | A_10_P002928 | BC045217 | 1.2 |
| 848 | A_10_P002676 | BC044096 | 1.2 |
| 849 | A_10_P015044 | BJ611886 | 1.2 |
| 850 | A_10_P021227 | CA971219 | 1.2 |
| 851 | A_10_P007370 | BC079683 | 1.2 |
| 852 | A_10_P006953 | BC077764 | 1.2 |
| 853 | A_10_P023292 | CB943738 | 1.2 |
| 854 | A_10_P005843 | BC073677 | 1.2 |
| 855 | A_10_P022166 | BC099246 | 1.2 |
| 856 | A_10_P006476 | BC076851 | 1.2 |
| 857 | A_10_P016781 | BP707782 | 1.2 |
| 858 | A_10_P000176 | AB114041 | 1.2 |
| 859 | A_10_P003291 | BC054185 | 1.2 |
| 860 | A_10_P008467 | BC084228 | 1.2 |
| 861 | A_10_P005106 | BC094146 | 1.2 |
| 862 | A_10_P009107 | BC087335 | 1.2 |
| 863 | A_10_P003692 | BC059300 | 1.2 |
| 864 | A_10_P008359 | BC084057 | 1.2 |
| 865 | A_10_P017113 | BP727358 | 1.2 |
| 866 | A_10_P007914 | BC081228 | 1.2 |
| 867 | A_10_P006951 | BC077759 | 1.2 |
| 868 | A_10_P017871 | BC097687 | 1.2 |
| 869 | A_10_P006832 | BC077539 | 1.2 |
| 870 | A_10_P002593 | BC043981 | 1.2 |
| 871 | A_10_P016393 | BP691865 | 1.2 |
| 872 | A_10_P003822 | BC060344 | 1.2 |
| 873 | A_10_P009258 | BC088674 | 1.2 |
| 874 | A_10_P002361 | BC042290 | 1.2 |
| 875 | A_10_P005210 | BC072875 | 1.2 |
| 876 | A_10_P009577 | BC091718 | 1.2 |
| 877 | A_10_P007297 | BC078484 | 1.2 |
| 878 | A_10_P025767 | CK799110 | 1.2 |
| 879 | A_10_P009574 | BC091715 | 1.2 |
| 880 | A_10_P007144 | BC077974 | 1.2 |
| 881 | A_10_P005231 | BC072900 | 1.2 |
| 882 | A_10_P004367 | BC070569 | 1.2 |
| 883 | A_10_P014853 | BJ092292 | 1.2 |
| 884 | A_10_P001660 | AW640827 | 1.2 |
| 885 | A_10_P010678 | BF231749 | 1.2 |
| 886 | A_10_P024507 | CD360606 | 1.2 |
| 887 | A_10_P005334 | BC073024 | 1.2 |

**Supplemental Table S3:**

Genes significantly up-regulated in the presence of T3 alone in comparison to the untreated samples

|     |              |          |     |
|-----|--------------|----------|-----|
| 888 | A_10_P017368 | BQ383675 | 1.2 |
| 889 | A_10_P002790 | BC044713 | 1.2 |
| 890 | A_10_P014757 | BJ090099 | 1.2 |
| 891 | A_10_P003281 | BC054167 | 1.2 |
| 892 | A_10_P009742 | BE131834 | 1.2 |
| 893 | A_10_P002707 | BC044261 | 1.2 |
| 894 | A_10_P027070 | M18350   | 1.2 |
| 895 | A_10_P016798 | BP708540 | 1.2 |
| 896 | A_10_P004806 | BC072035 | 1.2 |
| 897 | A_10_P015070 | BJ613977 | 1.2 |
| 898 | A_10_P007575 | BC080047 | 1.2 |
| 899 | A_10_P009554 | BC090564 | 1.2 |
| 900 | A_10_P020337 | BX850179 | 1.2 |
| 901 | A_10_P009014 | BC086263 | 1.2 |
| 902 | A_10_P008472 | BC084233 | 1.2 |
| 903 | A_10_P004885 | BC072144 | 1.2 |
| 904 | A_10_P010346 | BE680764 | 1.2 |
| 905 | A_10_P004639 | BC070968 | 1.2 |
| 906 | A_10_P009950 | BE505753 | 1.2 |
| 907 | A_10_P000310 | AF107662 | 1.2 |
| 908 | A_10_P003970 | BC061657 | 1.2 |
| 909 | A_10_P004159 | BC068765 | 1.2 |
| 910 | A_10_P007522 | BC079989 | 1.2 |
| 911 | A_10_P020206 | BX848879 | 1.2 |
| 912 | A_10_P024457 | CD329937 | 1.2 |
| 913 | A_10_P003033 | BC046674 | 1.2 |
| 914 | A_10_P011807 | BG161387 | 1.2 |
| 915 | A_10_P002408 | BC042933 | 1.2 |
| 916 | A_10_P017357 | BQ109706 | 1.2 |
| 917 | A_10_P027241 | U31427   | 1.2 |
| 918 | A_10_P008432 | BC084162 | 1.2 |
| 919 | A_10_P004128 | BC068729 | 1.2 |
| 920 | A_10_P008056 | BC082442 | 1.2 |
| 921 | A_10_P008379 | BC084083 | 1.2 |
| 922 | A_10_P008088 | BC082477 | 1.2 |
| 923 | A_10_P004435 | BC070650 | 1.2 |
| 924 | A_10_P004944 | BC072207 | 1.2 |
| 925 | A_10_P009578 | BC091719 | 1.2 |
| 926 | A_10_P007623 | BC080100 | 1.2 |
| 927 | A_10_P006987 | BC077805 | 1.2 |
| 928 | A_10_P004430 | BC070645 | 1.2 |
| 929 | A_10_P001990 | AY344472 | 1.2 |
| 930 | A_10_P024451 | CD329863 | 1.2 |
| 931 | A_10_P008669 | BC084606 | 1.2 |
| 932 | A_10_P004480 | BC070704 | 1.2 |
| 933 | A_10_P008305 | BC082950 | 1.2 |
| 934 | A_10_P007861 | BC081171 | 1.2 |

**Supplemental Table S3:**

Genes significantly up-regulated in the presence of T3 alone in comparison to the untreated samples

|     |              |          |     |
|-----|--------------|----------|-----|
| 935 | A_10_P002177 | BC041206 | 1.2 |
| 936 | A_10_P024979 | CF288659 | 1.2 |
| 937 | A_10_P002155 | AY885243 | 1.2 |
| 938 | A_10_P021365 | CA973325 | 1.2 |
| 939 | A_10_P003536 | BC056060 | 1.2 |
| 940 | A_10_P005554 | BC073324 | 1.2 |
| 941 | A_10_P002285 | BC041732 | 1.2 |
| 942 | A_10_P004248 | BC068887 | 1.2 |
| 943 | A_10_P002746 | BC044315 | 1.2 |
| 944 | A_10_P009032 | BC086284 | 1.2 |
| 945 | A_10_P026602 | CV080006 | 1.2 |
| 946 | A_10_P012339 | BG513434 | 1.2 |
| 947 | A_10_P016455 | BP694263 | 1.2 |
| 948 | A_10_P007908 | BC081221 | 1.2 |
| 949 | A_10_P008237 | BC082867 | 1.2 |
| 950 | A_10_P002207 | BC041251 | 1.2 |
| 951 | A_10_P003962 | BC061649 | 1.2 |
| 952 | A_10_P000162 | AB107103 | 1.2 |
| 953 | A_10_P009209 | BC087494 | 1.2 |
| 954 | A_10_P007012 | BC077833 | 1.2 |
| 955 | A_10_P013874 | BJ061488 | 1.2 |
| 956 | A_10_P003982 | BC061671 | 1.2 |
| 957 | A_10_P003246 | BC053765 | 1.2 |
| 958 | A_10_P002184 | BC041214 | 1.2 |
| 959 | A_10_P007482 | BC079814 | 1.2 |
| 960 | A_10_P005226 | BC072894 | 1.2 |
| 961 | A_10_P007700 | BC080994 | 1.2 |
| 962 | A_10_P010888 | BF612626 | 1.2 |
| 963 | A_10_P009402 | BC089138 | 1.2 |
| 964 | A_10_P002814 | BC044983 | 1.2 |
| 965 | A_10_P008470 | BC084231 | 1.2 |
| 966 | A_10_P023990 | CD302332 | 1.2 |
| 967 | A_10_P005622 | BC073405 | 1.2 |
| 968 | A_10_P001824 | AW767039 | 1.2 |
| 969 | A_10_P006559 | BC077235 | 1.2 |
| 970 | A_10_P005662 | BC073450 | 1.2 |
| 971 | A_10_P002585 | BC043968 | 1.2 |
| 972 | A_10_P005142 | BC072786 | 1.2 |
| 973 | A_10_P008196 | BC082818 | 1.2 |
| 974 | A_10_P023503 | CD253019 | 1.1 |
| 975 | A_10_P004282 | BC068926 | 1.1 |
| 976 | A_10_P000111 | AB067728 | 1.1 |
| 977 | A_10_P005937 | BC074142 | 1.1 |
| 978 | A_10_P005972 | BC074187 | 1.1 |
| 979 | A_10_P025141 | CF522626 | 1.1 |
| 980 | A_10_P007048 | BC077871 | 1.1 |
| 981 | A_10_P003997 | BC061930 | 1.1 |

**Supplemental Table S3:**

Genes significantly up-regulated in the presence of T3 alone in comparison to the untreated samples

|      |              |          |     |
|------|--------------|----------|-----|
| 982  | A_10_P004323 | BC068967 | 1.1 |
| 983  | A_10_P000628 | AF549908 | 1.1 |
| 984  | A_10_P021512 | CA980976 | 1.1 |
| 985  | A_10_P004477 | BC070701 | 1.1 |
| 986  | A_10_P007499 | BC079918 | 1.1 |
| 987  | A_10_P005699 | BC073492 | 1.1 |
| 988  | A_10_P008499 | BC084262 | 1.1 |
| 989  | A_10_P003870 | BC060411 | 1.1 |
| 990  | A_10_P006297 | BC075201 | 1.1 |
| 991  | A_10_P001952 | AY062923 | 1.1 |
| 992  | A_10_P000771 | AJ890844 | 1.1 |
| 993  | A_10_P005232 | BC072901 | 1.1 |
| 994  | A_10_P008153 | BC082673 | 1.1 |
| 995  | A_10_P005651 | BC073436 | 1.1 |
| 996  | A_10_P002131 | AY686699 | 1.1 |
| 997  | A_10_P019870 | BX845355 | 1.1 |
| 998  | A_10_P009355 | BC088943 | 1.1 |
| 999  | A_10_P009991 | BE506633 | 1.1 |
| 1000 | A_10_P003995 | BC061686 | 1.1 |
| 1001 | A_10_P003177 | BC047969 | 1.1 |
| 1002 | A_10_P020317 | BX849978 | 1.1 |
| 1003 | A_10_P001554 | AW634109 | 1.1 |
| 1004 | A_10_P006931 | BC077705 | 1.1 |
| 1005 | A_10_P013239 | BJ029671 | 1.1 |
| 1006 | A_10_P003087 | BC046738 | 1.1 |
| 1007 | A_10_P005919 | BC074123 | 1.1 |
| 1008 | A_10_P006547 | BC077223 | 1.1 |
| 1009 | A_10_P017788 | BQ730558 | 1.1 |
| 1010 | A_10_P004726 | BC071077 | 1.1 |
| 1011 | A_10_P024913 | CF286198 | 1.1 |
| 1012 | A_10_P004270 | BC068912 | 1.1 |
| 1013 | A_10_P011256 | BG019985 | 1.1 |
| 1014 | A_10_P009624 | BC092123 | 1.1 |
| 1015 | A_10_P004194 | BC068805 | 1.1 |
| 1016 | A_10_P021455 | CA974269 | 1.1 |
| 1017 | A_10_P025489 | CK796764 | 1.1 |
| 1018 | A_10_P005338 | BC073030 | 1.1 |
| 1019 | A_10_P001682 | AW642827 | 1.1 |
| 1020 | A_10_P016317 | BP688322 | 1.1 |
| 1021 | A_10_P004638 | BC070966 | 1.1 |
| 1022 | A_10_P002669 | BC044087 | 1.1 |
| 1023 | A_10_P009449 | BC089256 | 1.1 |
| 1024 | A_10_P002651 | BC044065 | 1.1 |
| 1025 | A_10_P023258 | CB942955 | 1.1 |
| 1026 | A_10_P005125 | BC072758 | 1.1 |
| 1027 | A_10_P020407 | BX851038 | 1.1 |
| 1028 | A_10_P006916 | BC077629 | 1.1 |

**Supplemental Table S3:**

Genes significantly up-regulated in the presence of T3 alone in comparison to the untreated samples

|      |              |          |     |
|------|--------------|----------|-----|
| 1029 | A_10_P021577 | CA981676 | 1.1 |
| 1030 | A_10_P005473 | BC073225 | 1.1 |
| 1031 | A_10_P023878 | CD256936 | 1.1 |
| 1032 | A_10_P001641 | AW640264 | 1.1 |
| 1033 | A_10_P023511 | CD253118 | 1.1 |
| 1034 | A_10_P011449 | BG022351 | 1.1 |
| 1035 | A_10_P004385 | BC070596 | 1.1 |
| 1036 | A_10_P007532 | BC079999 | 1.1 |
| 1037 | A_10_P016835 | BP710338 | 1.1 |
| 1038 | A_10_P001308 | AW199874 | 1.1 |
| 1039 | A_10_P017962 | BQ733226 | 1.1 |
| 1040 | A_10_P002341 | BC042264 | 1.1 |
| 1041 | A_10_P011576 | BG023484 | 1.1 |
| 1042 | A_10_P008963 | BC085058 | 1.1 |
| 1043 | A_10_P003927 | BC060478 | 1.1 |
| 1044 | A_10_P009087 | BC087307 | 1.1 |
| 1045 | A_10_P009164 | BC087423 | 1.1 |
| 1046 | A_10_P006375 | BC076742 | 1.1 |
| 1047 | A_10_P011187 | BG019234 | 1.1 |
| 1048 | A_10_P000742 | AJ514425 | 1.1 |
| 1049 | A_10_P004038 | BC063738 | 1.1 |
| 1050 | A_10_P016869 | BP713293 | 1.1 |
| 1051 | A_10_P009592 | BC092019 | 1.1 |
