# Supplementary material
Source: PubMed Central journal article supplement (PMC2689811)
Supplement: en.2008-1503_7.pdf [file en.2008-1503_7.pdf]

**Supplemental Table S5:**

Genes significantly up-regulated in the presence of BPA alone in comparison to the untreated samples

|    | <b>Probe Name</b> | <b>GenBank</b> | <b>Fold change</b> |
|----|-------------------|----------------|--------------------|
| 1  | A_10_P023003      | CB565547       | 10.4               |
| 2  | A_10_P015773      | BJ640739       | 8.2                |
| 3  | A_10_P009875      | BE491416       | 7.7                |
| 4  | A_10_P025257      | CF548920       | 6.0                |
| 5  | A_10_P011453      | BG022401       | 5.9                |
| 6  | A_10_P012677      | BG811190       | 4.8                |
| 7  | A_10_P025160      | CF546899       | 3.1                |
| 8  | A_10_P002535      | BC043864       | 2.9                |
| 9  | A_10_P009044      | BC086297       | 2.4                |
| 10 | A_10_P001772      | AW765313       | 2.3                |
| 11 | A_10_P026167      | CN318237       | 2.1                |
| 12 | A_10_P024348      | CD328086       | 2.0                |
| 13 | A_10_P008211      | BC082839       | 1.9                |
| 14 | A_10_P002183      | BC041213       | 1.9                |
| 15 | A_10_P004723      | BC071071       | 1.9                |
| 16 | A_10_P007619      | BC080096       | 1.9                |
| 17 | A_10_P008993      | BC085209       | 1.9                |
| 18 | A_10_P004454      | BC070670       | 1.8                |
| 19 | A_10_P011869      | BG162076       | 1.8                |
| 20 | A_10_P011391      | BG021170       | 1.8                |
| 21 | A_10_P000120      | AB075925       | 1.7                |
| 22 | A_10_P023517      | CD253165       | 1.7                |
| 23 | A_10_P005697      | BC073490       | 1.7                |
| 24 | A_10_P004793      | BC071159       | 1.7                |
| 25 | A_10_P006863      | BC077573       | 1.7                |
| 26 | A_10_P017110      | BP727251       | 1.6                |
| 27 | A_10_P025786      | CK799249       | 1.6                |
| 28 | A_10_P014195      | BJ077016       | 1.6                |
| 29 | A_10_P016193      | BP683833       | 1.6                |
| 30 | A_10_P025128      | CF522012       | 1.6                |
| 31 | A_10_P027181      | U08407         | 1.6                |
| 32 | A_10_P016798      | BP708540       | 1.6                |
| 33 | A_10_P006217      | BC074477       | 1.5                |
| 34 | A_10_P013071      | BI443557       | 1.5                |
| 35 | A_10_P017113      | BP727358       | 1.5                |
| 36 | A_10_P004449      | BC070665       | 1.5                |
| 37 | A_10_P001431      | AW200549       | 1.5                |
| 38 | A_10_P013276      | BJ032910       | 1.5                |
| 39 | A_10_P024567      | CD361341       | 1.5                |
| 40 | A_10_P025385      | CK741953       | 1.5                |
| 41 | A_10_P007330      | BC078565       | 1.5                |

**Supplemental Table S5:**

Genes significantly up-regulated in the presence of BPA alone in comparison to the untreated samples

|    |              |          |     |
|----|--------------|----------|-----|
| 42 | A_10_P001380 | AW200247 | 1.5 |
| 43 | A_10_P000021 | AB015205 | 1.5 |
| 44 | A_10_P004149 | BC068755 | 1.5 |
| 45 | A_10_P021293 | CA972222 | 1.5 |
| 46 | A_10_P011518 | BG022921 | 1.5 |
| 47 | A_10_P003500 | BC056020 | 1.5 |
| 48 | A_10_P000049 | AB030443 | 1.4 |
| 49 | A_10_P013871 | BJ061090 | 1.4 |
| 50 | A_10_P018162 | BQ736403 | 1.4 |
| 51 | A_10_P005881 | BC073718 | 1.4 |
| 52 | A_10_P004290 | BC068934 | 1.4 |
| 53 | A_10_P007033 | BC077854 | 1.4 |
| 54 | A_10_P003526 | BC056049 | 1.4 |
| 55 | A_10_P019905 | BX845814 | 1.4 |
| 56 | A_10_P012561 | BG579849 | 1.4 |
| 57 | A_10_P003116 | BC046859 | 1.4 |
| 58 | A_10_P015971 | BM180847 | 1.4 |
| 59 | A_10_P026964 | D83649   | 1.4 |
| 60 | A_10_P014864 | BJ092479 | 1.4 |
| 61 | A_10_P001945 | AY052629 | 1.4 |
| 62 | A_10_P014008 | BJ069360 | 1.4 |
| 63 | A_10_P004381 | BC070590 | 1.4 |
| 64 | A_10_P007955 | BC081272 | 1.4 |
| 65 | A_10_P008495 | BC084257 | 1.4 |
| 66 | A_10_P007667 | BC080392 | 1.4 |
| 67 | A_10_P000423 | AF231035 | 1.4 |
| 68 | A_10_P013933 | BJ065503 | 1.4 |
| 69 | A_10_P004984 | BC072252 | 1.4 |
| 70 | A_10_P027352 | U81290   | 1.4 |
| 71 | A_10_P006468 | BC076843 | 1.4 |
| 72 | A_10_P016499 | BP696237 | 1.4 |
| 73 | A_10_P011433 | BG022275 | 1.4 |
| 74 | A_10_P002057 | AY344472 | 1.4 |
| 75 | A_10_P021334 | CA972881 | 1.4 |
| 76 | A_10_P020645 | BX853527 | 1.4 |
| 77 | A_10_P003143 | BC046952 | 1.4 |
| 78 | A_10_P007888 | BC081201 | 1.4 |
| 79 | A_10_P002046 | AY319522 | 1.4 |
| 80 | A_10_P008416 | BC084127 | 1.4 |
| 81 | A_10_P002651 | BC044065 | 1.3 |
| 82 | A_10_P003806 | BC060026 | 1.3 |
| 83 | A_10_P010812 | BF610679 | 1.3 |
| 84 | A_10_P009527 | BC090224 | 1.3 |
| 85 | A_10_P008314 | BC083004 | 1.3 |
| 86 | A_10_P015095 | BJ616136 | 1.3 |
| 87 | A_10_P025494 | CK796806 | 1.3 |
| 88 | A_10_P024852 | CF284278 | 1.3 |

**Supplemental Table S5:**

Genes significantly up-regulated in the presence of BPA alone in comparison to the untreated samples

|     |              |          |     |
|-----|--------------|----------|-----|
| 89  | A_10_P010876 | BF612190 | 1.3 |
| 90  | A_10_P019934 | BX846071 | 1.3 |
| 91  | A_10_P008965 | BC085060 | 1.3 |
| 92  | A_10_P027490 | DQ066918 | 1.3 |
| 93  | A_10_P025572 | CK797468 | 1.3 |
| 94  | A_10_P008456 | BC084216 | 1.3 |
| 95  | A_10_P019877 | BC095924 | 1.3 |
| 96  | A_10_P000068 | AB037936 | 1.3 |
| 97  | A_10_P007280 | BC078124 | 1.3 |
| 98  | A_10_P019800 | BX844453 | 1.3 |
| 99  | A_10_P003028 | BC046669 | 1.3 |
| 100 | A_10_P007425 | BC079744 | 1.3 |
| 101 | A_10_P008823 | BC084852 | 1.3 |
| 102 | A_10_P020527 | BX852260 | 1.3 |
| 103 | A_10_P023700 | CD255175 | 1.3 |
| 104 | A_10_P005493 | BC073249 | 1.3 |
| 105 | A_10_P010244 | BE669221 | 1.3 |
| 106 | A_10_P006142 | BC074390 | 1.3 |
| 107 | A_10_P023570 | CD253893 | 1.3 |
| 108 | A_10_P007027 | BC077848 | 1.3 |
| 109 | A_10_P023520 | CD253204 | 1.3 |
| 110 | A_10_P016124 | BM928974 | 1.3 |
| 111 | A_10_P008726 | BC084736 | 1.3 |
| 112 | A_10_P006308 | BC075217 | 1.3 |
| 113 | A_10_P010384 | BF024854 | 1.3 |
| 114 | A_10_P006810 | BC077514 | 1.3 |
| 115 | A_10_P008313 | BC083003 | 1.3 |
| 116 | A_10_P003107 | BC046850 | 1.3 |
| 117 | A_10_P023906 | CD300904 | 1.3 |
| 118 | A_10_P024350 | CD328137 | 1.3 |
| 119 | A_10_P006581 | BC077264 | 1.3 |
| 120 | A_10_P004888 | BC072148 | 1.3 |
| 121 | A_10_P003515 | BC056038 | 1.3 |
| 122 | A_10_P000471 | AF286645 | 1.3 |
| 123 | A_10_P003321 | BC054225 | 1.3 |
| 124 | A_10_P007057 | BC077880 | 1.3 |
| 125 | A_10_P005312 | BC072996 | 1.3 |
| 126 | A_10_P006850 | BC077559 | 1.3 |
| 127 | A_10_P005940 | BC074145 | 1.3 |
| 128 | A_10_P005248 | BC072921 | 1.3 |
| 129 | A_10_P000191 | AB176536 | 1.3 |
| 130 | A_10_P000630 | AF549913 | 1.3 |
| 131 | A_10_P011522 | BG022969 | 1.3 |
| 132 | A_10_P026605 | CV080234 | 1.3 |
| 133 | A_10_P011032 | BF615812 | 1.3 |
| 134 | A_10_P002759 | BC044330 | 1.3 |
| 135 | A_10_P019938 | BX846115 | 1.3 |

**Supplemental Table S5:**

Genes significantly up-regulated in the presence of BPA alone in comparison to the untreated samples

|     |              |          |     |
|-----|--------------|----------|-----|
| 136 | A_10_P016552 | BP698904 | 1.3 |
| 137 | A_10_P006963 | BC077778 | 1.3 |
| 138 | A_10_P025104 | CF521010 | 1.3 |
| 139 | A_10_P003847 | BC060383 | 1.3 |
| 140 | A_10_P013229 | BI941475 | 1.3 |
| 141 | A_10_P016694 | BP704802 | 1.3 |
| 142 | A_10_P007716 | BC081011 | 1.3 |
| 143 | A_10_P003589 | BC056126 | 1.3 |
| 144 | A_10_P008133 | BC082652 | 1.2 |
| 145 | A_10_P013884 | BJ062152 | 1.2 |
| 146 | A_10_P014239 | BJ077953 | 1.2 |
| 147 | A_10_P005521 | BC073282 | 1.2 |
| 148 | A_10_P020060 | BX847376 | 1.2 |
| 149 | A_10_P011172 | BC097925 | 1.2 |
| 150 | A_10_P006248 | BC075136 | 1.2 |
| 151 | A_10_P000199 | AF001596 | 1.2 |
| 152 | A_10_P014129 | BJ075290 | 1.2 |
| 153 | A_10_P000523 | AF353715 | 1.2 |
| 154 | A_10_P003546 | BC056076 | 1.2 |
| 155 | A_10_P011647 | BG038309 | 1.2 |
| 156 | A_10_P002687 | BC044107 | 1.2 |
| 157 | A_10_P023511 | CD253118 | 1.2 |
| 158 | A_10_P010228 | BE576565 | 1.2 |
| 159 | A_10_P001211 | AW199326 | 1.2 |
| 160 | A_10_P008779 | BC084799 | 1.2 |
| 161 | A_10_P008208 | BC082836 | 1.2 |
| 162 | A_10_P003788 | BC060008 | 1.2 |
| 163 | A_10_P002274 | BC041721 | 1.2 |
| 164 | A_10_P007135 | BC077964 | 1.2 |
| 165 | A_10_P021705 | CA983018 | 1.2 |
| 166 | A_10_P020196 | BX848745 | 1.2 |
| 167 | A_10_P002323 | BC042235 | 1.2 |
| 168 | A_10_P006326 | BC075239 | 1.2 |
| 169 | A_10_P010820 | BF610772 | 1.2 |
| 170 | A_10_P001683 | AW642902 | 1.2 |
| 171 | A_10_P012612 | BG731491 | 1.2 |
| 172 | A_10_P006331 | BC094114 | 1.2 |
| 173 | A_10_P005610 | BC073392 | 1.2 |
| 174 | A_10_P021757 | CA983600 | 1.2 |
| 175 | A_10_P023503 | CD253019 | 1.2 |
| 176 | A_10_P008231 | BC082861 | 1.2 |
| 177 | A_10_P003524 | BC056047 | 1.2 |
| 178 | A_10_P005829 | BC073659 | 1.2 |
| 179 | A_10_P012953 | BI314838 | 1.2 |
| 180 | A_10_P004037 | BC063737 | 1.2 |
| 181 | A_10_P007206 | BC078042 | 1.2 |
| 182 | A_10_P007444 | BC079769 | 1.2 |

**Supplemental Table S5:**

Genes significantly up-regulated in the presence of BPA alone in comparison to the untreated samples

|     |              |          |     |
|-----|--------------|----------|-----|
| 183 | A_10_P020635 | BX853455 | 1.2 |
| 184 | A_10_P007408 | BC079727 | 1.2 |
| 185 | A_10_P006279 | BC075171 | 1.2 |
| 186 | A_10_P004130 | BC068732 | 1.2 |
| 187 | A_10_P003156 | BC047254 | 1.2 |
| 188 | A_10_P006061 | BC074303 | 1.2 |
| 189 | A_10_P005648 | BC073433 | 1.2 |
| 190 | A_10_P019985 | BX846575 | 1.2 |
| 191 | A_10_P012005 | BG234611 | 1.2 |
| 192 | A_10_P020101 | BX847771 | 1.2 |
| 193 | A_10_P004278 | BC068922 | 1.2 |
| 194 | A_10_P004662 | BC070999 | 1.2 |
| 195 | A_10_P004572 | BC070803 | 1.2 |
| 196 | A_10_P009074 | BC086634 | 1.2 |
| 197 | A_10_P007824 | BC081130 | 1.2 |
| 198 | A_10_P002396 | BC042355 | 1.2 |
| 199 | A_10_P008279 | BC082920 | 1.2 |
| 200 | A_10_P004094 | BC068688 | 1.2 |
| 201 | A_10_P021280 | CA971914 | 1.2 |
| 202 | A_10_P003167 | BC047957 | 1.2 |
| 203 | A_10_P009128 | BC087373 | 1.2 |
| 204 | A_10_P002306 | BC041758 | 1.2 |
| 205 | A_10_P007865 | BC081175 | 1.2 |
| 206 | A_10_P002012 | BC097591 | 1.2 |
| 207 | A_10_P002635 | BC044038 | 1.2 |
| 208 | A_10_P014111 | BJ074424 | 1.2 |
| 209 | A_10_P005746 | BC073550 | 1.2 |
| 210 | A_10_P005166 | BC072818 | 1.2 |
| 211 | A_10_P015648 | BJ637619 | 1.2 |
| 212 | A_10_P001996 | AY197550 | 1.2 |
| 213 | A_10_P001382 | AW200252 | 1.2 |
| 214 | A_10_P023432 | CD100271 | 1.2 |
| 215 | A_10_P000092 | AB048259 | 1.2 |
| 216 | A_10_P007514 | BC079981 | 1.2 |
| 217 | A_10_P003704 | BC059313 | 1.2 |
| 218 | A_10_P020825 | BX855559 | 1.2 |
| 219 | A_10_P017960 | BQ733202 | 1.2 |
| 220 | A_10_P004450 | BC070666 | 1.2 |
| 221 | A_10_P009107 | BC087335 | 1.2 |
| 222 | A_10_P004623 | BC070859 | 1.2 |
| 223 | A_10_P020156 | BX848330 | 1.2 |
| 224 | A_10_P007984 | BC082364 | 1.2 |
| 225 | A_10_P002092 | AY525098 | 1.2 |
| 226 | A_10_P008094 | BC082529 | 1.2 |
| 227 | A_10_P008643 | BC084419 | 1.2 |
| 228 | A_10_P001401 | AW200411 | 1.2 |
| 229 | A_10_P001732 | AW646316 | 1.2 |

**Supplemental Table S5:**

Genes significantly up-regulated in the presence of BPA alone in comparison to the untreated samples

|     |              |          |     |
|-----|--------------|----------|-----|
| 230 | A_10_P002618 | BC044016 | 1.2 |
| 231 | A_10_P001390 | AW200278 | 1.2 |
| 232 | A_10_P006282 | BC075175 | 1.2 |
| 233 | A_10_P011914 | BG163049 | 1.2 |
| 234 | A_10_P004826 | BC072059 | 1.2 |
| 235 | A_10_P008257 | BC082892 | 1.2 |
| 236 | A_10_P009138 | BC087387 | 1.2 |
| 237 | A_10_P007597 | BC080072 | 1.2 |
| 238 | A_10_P007552 | BC080021 | 1.2 |
| 239 | A_10_P009337 | BC088919 | 1.2 |
| 240 | A_10_P016129 | BM928998 | 1.2 |
| 241 | A_10_P000767 | AJ971473 | 1.2 |
| 242 | A_10_P004639 | BC070968 | 1.2 |
| 243 | A_10_P007032 | BC077853 | 1.2 |
| 244 | A_10_P007284 | BC078128 | 1.2 |
| 245 | A_10_P003410 | BC054961 | 1.2 |
| 246 | A_10_P003065 | BC046711 | 1.2 |
| 247 | A_10_P008988 | BC085203 | 1.2 |
| 248 | A_10_P007054 | BC077877 | 1.2 |
| 249 | A_10_P022375 | CB558899 | 1.2 |
| 250 | A_10_P008869 | BC084924 | 1.2 |
| 251 | A_10_P002921 | BC045209 | 1.2 |
| 252 | A_10_P025693 | CK798599 | 1.2 |
| 253 | A_10_P006193 | BC074447 | 1.2 |
| 254 | A_10_P025543 | CK797196 | 1.2 |
| 255 | A_10_P010839 | BF611222 | 1.2 |
| 256 | A_10_P007270 | BC078114 | 1.2 |
| 257 | A_10_P008861 | BC084895 | 1.2 |
| 258 | A_10_P005776 | BC073590 | 1.2 |
| 259 | A_10_P006601 | BC077286 | 1.2 |
| 260 | A_10_P009020 | BC086271 | 1.2 |
| 261 | A_10_P003581 | BC056117 | 1.2 |
| 262 | A_10_P008634 | BC084408 | 1.2 |
| 263 | A_10_P027360 | U89265   | 1.2 |
| 264 | A_10_P024731 | CD811314 | 1.2 |
| 265 | A_10_P007136 | BC077965 | 1.2 |
| 266 | A_10_P004644 | BC070974 | 1.2 |
| 267 | A_10_P007520 | BC079987 | 1.2 |
| 268 | A_10_P009524 | BC090221 | 1.2 |
| 269 | A_10_P025621 | CK797924 | 1.2 |
| 270 | A_10_P016954 | BP717767 | 1.2 |
| 271 | A_10_P003990 | BC061680 | 1.2 |
| 272 | A_10_P007951 | BC081268 | 1.2 |
| 273 | A_10_P007541 | BC080008 | 1.2 |
| 274 | A_10_P002626 | BC044027 | 1.2 |
| 275 | A_10_P013963 | BJ067538 | 1.2 |
| 276 | A_10_P008503 | BC084266 | 1.2 |

**Supplemental Table S5:**

Genes significantly up-regulated in the presence of BPA alone in comparison to the untreated samples

|     |              |          |     |
|-----|--------------|----------|-----|
| 277 | A_10_P008269 | BC082905 | 1.2 |
| 278 | A_10_P005183 | BC072842 | 1.2 |
| 279 | A_10_P003559 | BC056092 | 1.2 |
| 280 | A_10_P002708 | BC044262 | 1.2 |
| 281 | A_10_P000385 | AF187864 | 1.2 |
| 282 | A_10_P020151 | BX848252 | 1.2 |
| 283 | A_10_P006602 | BC077287 | 1.2 |
| 284 | A_10_P003385 | BC054306 | 1.2 |
| 285 | A_10_P006693 | BC077381 | 1.2 |
| 286 | A_10_P016494 | BP695997 | 1.2 |
| 287 | A_10_P016473 | BP695194 | 1.2 |
| 288 | A_10_P025948 | CK800673 | 1.2 |
| 289 | A_10_P023995 | CD302391 | 1.2 |
| 290 | A_10_P009094 | BC087318 | 1.2 |
| 291 | A_10_P000172 | AB111446 | 1.2 |
| 292 | A_10_P012221 | BG438691 | 1.2 |
| 293 | A_10_P009263 | BC088682 | 1.2 |
| 294 | A_10_P006429 | BC076802 | 1.2 |
| 295 | A_10_P002715 | BC044269 | 1.2 |
| 296 | A_10_P007485 | BC079817 | 1.2 |
| 297 | A_10_P025561 | CK797365 | 1.2 |
| 298 | A_10_P003498 | BC056018 | 1.2 |
| 299 | A_10_P024444 | CD329717 | 1.2 |
| 300 | A_10_P008141 | BC082660 | 1.2 |
| 301 | A_10_P002032 | AY289193 | 1.2 |
| 302 | A_10_P003518 | BC056041 | 1.2 |
| 303 | A_10_P006216 | BC074476 | 1.2 |
| 304 | A_10_P007217 | BC078056 | 1.2 |
| 305 | A_10_P014911 | BJ094053 | 1.2 |
| 306 | A_10_P008751 | BC084768 | 1.2 |
| 307 | A_10_P006372 | BC076739 | 1.2 |
| 308 | A_10_P009396 | BC089131 | 1.2 |
| 309 | A_10_P002871 | BC045050 | 1.2 |
| 310 | A_10_P009336 | BC088918 | 1.2 |
| 311 | A_10_P017831 | BQ731232 | 1.2 |
| 312 | A_10_P007985 | BC082365 | 1.2 |
| 313 | A_10_P011639 | BG038211 | 1.2 |
| 314 | A_10_P000338 | AF146087 | 1.2 |
| 315 | A_10_P003019 | BC046658 | 1.2 |
| 316 | A_10_P007728 | BC081023 | 1.2 |
| 317 | A_10_P020772 | BX854953 | 1.2 |
| 318 | A_10_P004154 | BC068760 | 1.2 |
| 319 | A_10_P006600 | BC077285 | 1.2 |
| 320 | A_10_P001741 | AW646661 | 1.2 |
| 321 | A_10_P008110 | BC082628 | 1.2 |
| 322 | A_10_P006161 | BC074410 | 1.2 |
| 323 | A_10_P003591 | BC056129 | 1.2 |

**Supplemental Table S5:**

Genes significantly up-regulated in the presence of BPA alone in comparison to the untreated samples

|     |              |          |     |
|-----|--------------|----------|-----|
| 324 | A_10_P002883 | BC045067 | 1.2 |
| 325 | A_10_P006594 | BC077279 | 1.2 |
| 326 | A_10_P023232 | CB942193 | 1.2 |
| 327 | A_10_P025870 | CK800094 | 1.2 |
| 328 | A_10_P002298 | BC041749 | 1.2 |
| 329 | A_10_P008572 | BC084341 | 1.2 |
| 330 | A_10_P016930 | BP716170 | 1.2 |
| 331 | A_10_P008488 | BC084250 | 1.1 |
| 332 | A_10_P011131 | BG018272 | 1.1 |
| 333 | A_10_P025848 | CK799894 | 1.1 |
| 334 | A_10_P027489 | X93494   | 1.1 |
| 335 | A_10_P009136 | BC087383 | 1.1 |
| 336 | A_10_P020207 | BX848880 | 1.1 |
| 337 | A_10_P008769 | BC084788 | 1.1 |
| 338 | A_10_P005564 | BC073337 | 1.1 |
| 339 | A_10_P010968 | BF614568 | 1.1 |
| 340 | A_10_P007229 | BC078068 | 1.1 |
| 341 | A_10_P004086 | BC068678 | 1.1 |
| 342 | A_10_P007291 | BC078136 | 1.1 |
| 343 | A_10_P002104 | AY573848 | 1.1 |
| 344 | A_10_P009025 | BC086277 | 1.1 |
| 345 | A_10_P016740 | BP706227 | 1.1 |
| 346 | A_10_P006592 | BC077277 | 1.1 |
| 347 | A_10_P009256 | BC088671 | 1.1 |
| 348 | A_10_P024019 | CD303201 | 1.1 |
| 349 | A_10_P007254 | BC078098 | 1.1 |
| 350 | A_10_P025903 | CK800385 | 1.1 |
| 351 | A_10_P006655 | BC077340 | 1.1 |
| 352 | A_10_P020665 | BX853762 | 1.1 |
| 353 | A_10_P004386 | BC070597 | 1.1 |
| 354 | A_10_P013973 | BJ067936 | 1.1 |
| 355 | A_10_P025953 | CK800694 | 1.1 |
| 356 | A_10_P002579 | BC043961 | 1.1 |
| 357 | A_10_P006244 | BC075132 | 1.1 |
| 358 | A_10_P003528 | BC056052 | 1.1 |
| 359 | A_10_P024984 | CF288764 | 1.1 |
| 360 | A_10_P020526 | BX852250 | 1.1 |
| 361 | A_10_P024894 | CF285602 | 1.1 |
| 362 | A_10_P023415 | CD099668 | 1.1 |
| 363 | A_10_P003078 | BC046726 | 1.1 |
| 364 | A_10_P000112 | AB070723 | 1.1 |
| 365 | A_10_P007264 | BC078108 | 1.1 |
| 366 | A_10_P004980 | BC072248 | 1.1 |
| 367 | A_10_P005490 | BC073246 | 1.1 |
| 368 | A_10_P016522 | BP697688 | 1.1 |
| 369 | A_10_P006422 | BC076795 | 1.1 |
| 370 | A_10_P004259 | BC068899 | 1.1 |



**Supplemental Table S5:**

Genes significantly up-regulated in the presence of BPA alone in comparison to the untreated samples

|     |              |          |     |
|-----|--------------|----------|-----|
| 371 | A_10_P002015 | AY256967 | 1.1 |
| 372 | A_10_P007872 | BC081182 | 1.1 |
| 373 | A_10_P008245 | BC097583 | 1.1 |
| 374 | A_10_P025649 | CK798161 | 1.1 |
| 375 | A_10_P004897 | BC072158 | 1.1 |
| 376 | A_10_P005334 | BC073024 | 1.1 |
| 377 | A_10_P001952 | AY062923 | 1.1 |
| 378 | A_10_P004709 | BC071053 | 1.1 |
| 379 | A_10_P019982 | BX846558 | 1.1 |
| 380 | A_10_P015070 | BJ613977 | 1.1 |
| 381 | A_10_P005878 | BC073715 | 1.1 |
| 382 | A_10_P003608 | BC056848 | 1.1 |
| 383 | A_10_P004286 | BC068930 | 1.1 |
| 384 | A_10_P014747 | BJ089923 | 1.1 |
| 385 | A_10_P003369 | BC054285 | 1.1 |
| 386 | A_10_P020362 | BX850436 | 1.1 |
| 387 | A_10_P005345 | BC073038 | 1.1 |
| 388 | A_10_P004120 | BC068719 | 1.1 |
| 389 | A_10_P002980 | BC046257 | 1.1 |
| 390 | A_10_P002294 | BC041742 | 1.1 |
| 391 | A_10_P004175 | BC068782 | 1.1 |
| 392 | A_10_P006483 | BC076858 | 1.1 |
| 393 | A_10_P027232 | U27842   | 1.1 |
| 394 | A_10_P008432 | BC084162 | 1.1 |
| 395 | A_10_P020366 | BX850461 | 1.1 |
| 396 | A_10_P003907 | BC060454 | 1.1 |
| 397 | A_10_P006812 | BC077516 | 1.1 |
| 398 | A_10_P016127 | BM928982 | 1.1 |
| 399 | A_10_P027322 | U67129   | 1.1 |
| 400 | A_10_P005414 | BC073114 | 1.1 |
| 401 | A_10_P005291 | BC072973 | 1.1 |
| 402 | A_10_P008379 | BC084083 | 1.1 |
| 403 | A_10_P008457 | BC084217 | 1.1 |
| 404 | A_10_P015511 | BJ634046 | 1.1 |
| 405 | A_10_P000039 | AB025112 | 1.1 |
| 406 | A_10_P007319 | BC078533 | 1.1 |
| 407 | A_10_P003644 | BC057726 | 1.1 |
| 408 | A_10_P005992 | BC074210 | 1.1 |
| 409 | A_10_P003856 | BC060396 | 1.1 |
| 410 | A_10_P007759 | BC081059 | 1.1 |
| 411 | A_10_P004347 | BC070543 | 1.1 |
| 412 | A_10_P006929 | BC077701 | 1.1 |
| 413 | A_10_P009066 | BC086475 | 1.1 |
| 414 | A_10_P000137 | AB086020 | 1.1 |
| 415 | A_10_P003588 | BC056125 | 1.1 |
| 416 | A_10_P010305 | BE679557 | 1.1 |
| 417 | A_10_P007226 | BC078065 | 1.1 |

**Supplemental Table S5:**

Genes significantly up-regulated in the presence of BPA alone in comparison to the untreated samples

|     |              |          |     |
|-----|--------------|----------|-----|
| 418 | A_10_P007834 | BC081141 | 1.1 |
| 419 | A_10_P004452 | BC070668 | 1.1 |
| 420 | A_10_P006221 | BC074481 | 1.1 |
| 421 | A_10_P003449 | BC055959 | 1.1 |
| 422 | A_10_P020522 | BC094099 | 1.1 |
| 423 | A_10_P008772 | BC084792 | 1.1 |
| 424 | A_10_P004685 | BC071024 | 1.1 |
| 425 | A_10_P025497 | CK796828 | 1.1 |
| 426 | A_10_P002552 | BC043887 | 1.1 |
| 427 | A_10_P006378 | BC076745 | 1.1 |
| 428 | A_10_P004416 | BC070631 | 1.1 |
| 429 | A_10_P022924 | CB564703 | 1.1 |
| 430 | A_10_P003503 | BC056024 | 1.1 |
| 431 | A_10_P005578 | BC073353 | 1.1 |
| 432 | A_10_P000433 | AF244359 | 1.1 |
| 433 | A_10_P003305 | BC054206 | 1.1 |
| 434 | A_10_P008047 | BC082432 | 1.1 |
| 435 | A_10_P019766 | BX844087 | 1.1 |
| 436 | A_10_P006171 | BC074421 | 1.1 |
| 437 | A_10_P003693 | BC059301 | 1.1 |
| 438 | A_10_P004015 | BC063273 | 1.1 |
| 439 | A_10_P002997 | BC094074 | 1.1 |
| 440 | A_10_P003029 | BC046670 | 1.1 |
| 441 | A_10_P003962 | BC061649 | 1.1 |
| 442 | A_10_P003692 | BC059300 | 1.1 |
| 443 | A_10_P018719 | BC097582 | 1.1 |
| 444 | A_10_P009223 | BC087516 | 1.1 |
| 445 | A_10_P006348 | BC076646 | 1.1 |
| 446 | A_10_P007751 | BC081049 | 1.1 |
| 447 | A_10_P009989 | BE506618 | 1.1 |
| 448 | A_10_P009624 | BC092123 | 1.1 |
| 449 | A_10_P005231 | BC072900 | 1.1 |
| 450 | A_10_P007216 | BC078055 | 1.1 |
| 451 | A_10_P002505 | BC043826 | 1.1 |
| 452 | A_10_P008881 | BC084936 | 1.1 |
| 453 | A_10_P004260 | BC068900 | 1.1 |
| 454 | A_10_P006545 | BC077221 | 1.1 |
| 455 | A_10_P003900 | BC060446 | 1.1 |
| 456 | A_10_P025995 | CK803937 | 1.1 |
| 457 | A_10_P009554 | BC090564 | 1.1 |
| 458 | A_10_P017357 | BQ109706 | 1.1 |
| 459 | A_10_P026203 | CN322629 | 1.1 |
| 460 | A_10_P014903 | BJ093470 | 1.1 |
| 461 | A_10_P008217 | BC082845 | 1.1 |
| 462 | A_10_P004724 | BC071073 | 1.1 |
| 463 | A_10_P024140 | CD325861 | 1.1 |
| 464 | A_10_P013942 | BJ066067 | 1.1 |

**Supplemental Table S5:**

Genes significantly up-regulated in the presence of BPA alone in comparison to the untreated samples

|     |              |          |     |
|-----|--------------|----------|-----|
| 465 | A_10_P008689 | BC084631 | 1.1 |
| 466 | A_10_P009171 | BC087436 | 1.1 |
| 467 | A_10_P005293 | BC072976 | 1.1 |
| 468 | A_10_P009014 | BC086263 | 1.1 |
| 469 | A_10_P002470 | BC043779 | 1.1 |
| 470 | A_10_P024451 | CD329863 | 1.1 |
| 471 | A_10_P005396 | BC073096 | 1.1 |
| 472 | A_10_P007556 | BC080025 | 1.1 |
| 473 | A_10_P006168 | BC074418 | 1.1 |
| 474 | A_10_P017576 | BQ399739 | 1.1 |
| 475 | A_10_P006245 | BC075133 | 1.1 |
| 476 | A_10_P020619 | BX853308 | 1.1 |
| 477 | A_10_P005626 | BC073409 | 1.1 |
| 478 | A_10_P001310 | AW199885 | 1.1 |
| 479 | A_10_P002632 | BC044035 | 1.1 |
| 480 | A_10_P013856 | BJ060214 | 1.1 |
| 481 | A_10_P012868 | BG893417 | 1.1 |
| 482 | A_10_P006405 | BC076776 | 1.1 |
| 483 | A_10_P002676 | BC044096 | 1.1 |
| 484 | A_10_P008305 | BC082950 | 1.1 |
| 485 | A_10_P027545 | Z27093   | 1.1 |
| 486 | A_10_P003970 | BC061657 | 1.1 |
| 487 | A_10_P015128 | BJ617395 | 1.1 |
| 488 | A_10_P003880 | BC060421 | 1.1 |
| 489 | A_10_P026702 | CX130159 | 1.1 |
| 490 | A_10_P019885 | BX845543 | 1.1 |
| 491 | A_10_P002321 | BC042233 | 1.1 |
| 492 | A_10_P002372 | BC042309 | 1.1 |
| 493 | A_10_P000495 | AF308810 | 1.1 |
| 494 | A_10_P008916 | BC084972 | 1.1 |
| 495 | A_10_P020219 | BX848996 | 1.1 |
| 496 | A_10_P006064 | BC074306 | 1.1 |
| 497 | A_10_P005895 | BC073733 | 1.1 |
| 498 | A_10_P001598 | AW637084 | 1.1 |
| 499 | A_10_P002636 | BC044039 | 1.1 |
| 500 | A_10_P007001 | BC077821 | 1.1 |
| 501 | A_10_P003914 | BC060461 | 1.1 |
| 502 | A_10_P008885 | BC084941 | 1.1 |
| 503 | A_10_P011864 | BG162022 | 1.1 |
| 504 | A_10_P007092 | BC077917 | 1.1 |
| 505 | A_10_P020018 | BX846940 | 1.1 |
| 506 | A_10_P026942 | D14400   | 1.1 |
| 507 | A_10_P008986 | BC085200 | 1.1 |
