# Supplementary material
Source: PubMed Central journal article supplement (PMC2689811)
Supplement: en.2008-1503_8.pdf [file en.2008-1503_8.pdf]

**Supplemental Table S6:**

Genes significantly down-regulated in the presence of BPA alone in comparison to the untreated samples

|    | <b>Probe Name</b> | <b>GenBank</b> | <b>Fold change</b> |
|----|-------------------|----------------|--------------------|
| 1  | A_10_P000313      | AF109923       | 2.3                |
| 2  | A_10_P015575      | BJ635765       | 2.0                |
| 3  | A_10_P003954      | BC060751       | 1.7                |
| 4  | A_10_P002931      | BC045220       | 1.7                |
| 5  | A_10_P020109      | BX847839       | 1.7                |
| 6  | A_10_P000358      | AF170337       | 1.7                |
| 7  | A_10_P013044      | BI442341       | 1.7                |
| 8  | A_10_P014757      | BJ090099       | 1.7                |
| 9  | A_10_P007367      | BC079680       | 1.7                |
| 10 | A_10_P006927      | BC077649       | 1.6                |
| 11 | A_10_P021381      | CA973449       | 1.6                |
| 12 | A_10_P002025      | AY278679       | 1.5                |
| 13 | A_10_P002964      | BC045262       | 1.5                |
| 14 | A_10_P009194      | BC087471       | 1.5                |
| 15 | A_10_P013293      | BJ034725       | 1.5                |
| 16 | A_10_P012991      | BI315530       | 1.5                |
| 17 | A_10_P017758      | BQ729142       | 1.5                |
| 18 | A_10_P002950      | BC045244       | 1.5                |
| 19 | A_10_P013082      | BI444085       | 1.5                |
| 20 | A_10_P016419      | BP692999       | 1.5                |
| 21 | A_10_P023687      | CD254913       | 1.5                |
| 22 | A_10_P001989      | AY182251       | 1.4                |
| 23 | A_10_P024457      | CD329937       | 1.4                |
| 24 | A_10_P003276      | BC054155       | 1.4                |
| 25 | A_10_P007081      | BC077905       | 1.4                |
| 26 | A_10_P004739      | BC071097       | 1.4                |
| 27 | A_10_P012034      | BG264321       | 1.4                |
| 28 | A_10_P020765      | BX854874       | 1.4                |
| 29 | A_10_P013618      | BJ050186       | 1.4                |
| 30 | A_10_P011256      | BG019985       | 1.4                |
| 31 | A_10_P007946      | BC081263       | 1.4                |
| 32 | A_10_P008086      | BC082475       | 1.4                |
| 33 | A_10_P018218      | BQ737312       | 1.4                |
| 34 | A_10_P004430      | BC070645       | 1.4                |
| 35 | A_10_P006375      | BC076742       | 1.4                |
| 36 | A_10_P010027      | BE507589       | 1.4                |
| 37 | A_10_P002141      | AY762376       | 1.4                |
| 38 | A_10_P025528      | CK797077       | 1.4                |
| 39 | A_10_P015849      | BJ643003       | 1.4                |
| 40 | A_10_P011418      | BG022162       | 1.3                |
| 41 | A_10_P019649      | BX842761       | 1.3                |

**Supplemental Table S6:**

Genes significantly down-regulated in the presence of BPA alone in comparison to the untreated samples

|    |              |          |     |
|----|--------------|----------|-----|
| 42 | A_10_P003601 | BC056840 | 1.3 |
| 43 | A_10_P004825 | BC072058 | 1.3 |
| 44 | A_10_P003888 | BC060430 | 1.3 |
| 45 | A_10_P005362 | BC073058 | 1.3 |
| 46 | A_10_P008290 | BC082934 | 1.3 |
| 47 | A_10_P001821 | AW766953 | 1.3 |
| 48 | A_10_P002628 | BC044030 | 1.3 |
| 49 | A_10_P008745 | BC084761 | 1.3 |
| 50 | A_10_P003224 | BC049287 | 1.3 |
| 51 | A_10_P014810 | BJ091611 | 1.3 |
| 52 | A_10_P026983 | L02953   | 1.3 |
| 53 | A_10_P006742 | BC077437 | 1.3 |
| 54 | A_10_P003956 | BC060753 | 1.3 |
| 55 | A_10_P025262 | BC094271 | 1.3 |
| 56 | A_10_P026913 | CX135253 | 1.3 |
| 57 | A_10_P002212 | BC041256 | 1.3 |
| 58 | A_10_P010612 | BF072060 | 1.3 |
| 59 | A_10_P007914 | BC081228 | 1.3 |
| 60 | A_10_P001240 | AW199587 | 1.3 |
| 61 | A_10_P025549 | CK797267 | 1.3 |
| 62 | A_10_P009019 | BC086270 | 1.3 |
| 63 | A_10_P012074 | BG264723 | 1.3 |
| 64 | A_10_P012903 | BI312892 | 1.3 |
| 65 | A_10_P002560 | BC097543 | 1.3 |
| 66 | A_10_P008617 | BC084388 | 1.3 |
| 67 | A_10_P003399 | BC054947 | 1.3 |
| 68 | A_10_P024311 | CD327588 | 1.3 |
| 69 | A_10_P013046 | BI442485 | 1.3 |
| 70 | A_10_P010485 | BF047624 | 1.3 |
| 71 | A_10_P013939 | BJ065916 | 1.2 |
| 72 | A_10_P022416 | CB560198 | 1.2 |
| 73 | A_10_P008237 | BC082867 | 1.2 |
| 74 | A_10_P002766 | BC044675 | 1.2 |
| 75 | A_10_P002758 | BC044329 | 1.2 |
| 76 | A_10_P006786 | BC077486 | 1.2 |
| 77 | A_10_P011210 | BG019630 | 1.2 |
| 78 | A_10_P003181 | BC047973 | 1.2 |
| 79 | A_10_P002916 | BC045130 | 1.2 |
| 80 | A_10_P024500 | CD360533 | 1.2 |
| 81 | A_10_P020116 | BX847944 | 1.2 |
| 82 | A_10_P002961 | BC045259 | 1.2 |
| 83 | A_10_P007926 | BC081240 | 1.2 |
| 84 | A_10_P011449 | BG022351 | 1.2 |
| 85 | A_10_P020475 | BX851625 | 1.2 |
| 86 | A_10_P020753 | BX854738 | 1.2 |
| 87 | A_10_P000425 | AF232672 | 1.2 |
| 88 | A_10_P024727 | CD811210 | 1.2 |

**Supplemental Table S6:**

Genes significantly down-regulated in the presence of BPA alone in comparison to the untreated samples

|     |              |          |     |
|-----|--------------|----------|-----|
| 89  | A_10_P018194 | BQ736812 | 1.2 |
| 90  | A_10_P020383 | BX850674 | 1.2 |
| 91  | A_10_P003657 | BC057739 | 1.2 |
| 92  | A_10_P009549 | BC090252 | 1.2 |
| 93  | A_10_P000486 | AF302765 | 1.2 |
| 94  | A_10_P000771 | AJ890844 | 1.2 |
| 95  | A_10_P012298 | BG486020 | 1.2 |
| 96  | A_10_P002991 | BC046268 | 1.2 |
| 97  | A_10_P020241 | BX849222 | 1.2 |
| 98  | A_10_P008573 | BC084342 | 1.2 |
| 99  | A_10_P006953 | BC077764 | 1.2 |
| 100 | A_10_P003311 | BC054213 | 1.2 |
| 101 | A_10_P020560 | BX852606 | 1.2 |
| 102 | A_10_P001363 | AW200150 | 1.2 |
| 103 | A_10_P020613 | BX853225 | 1.2 |
| 104 | A_10_P009595 | BC092023 | 1.2 |
| 105 | A_10_P004917 | BC072178 | 1.2 |
| 106 | A_10_P005762 | BC073572 | 1.2 |
| 107 | A_10_P008639 | BC084414 | 1.2 |
| 108 | A_10_P011576 | BG023484 | 1.2 |
| 109 | A_10_P007622 | BC080099 | 1.2 |
| 110 | A_10_P025692 | CK798589 | 1.2 |
| 111 | A_10_P003094 | BC046746 | 1.2 |
| 112 | A_10_P002899 | BC045096 | 1.2 |
| 113 | A_10_P019954 | BX846232 | 1.2 |
| 114 | A_10_P006993 | BC077811 | 1.2 |
| 115 | A_10_P003309 | BC054211 | 1.2 |
| 116 | A_10_P005338 | BC073030 | 1.2 |
| 117 | A_10_P002657 | BC044073 | 1.2 |
| 118 | A_10_P017788 | BQ730558 | 1.2 |
| 119 | A_10_P002774 | BC044689 | 1.2 |
| 120 | A_10_P002527 | BC043852 | 1.2 |
| 121 | A_10_P009402 | BC089138 | 1.2 |
| 122 | A_10_P008819 | BC084848 | 1.2 |
| 123 | A_10_P006556 | BC077232 | 1.2 |
| 124 | A_10_P009096 | BC087320 | 1.2 |
| 125 | A_10_P026969 | D87209   | 1.2 |
| 126 | A_10_P005485 | BC073239 | 1.2 |
| 127 | A_10_P004665 | BC071002 | 1.2 |
| 128 | A_10_P027198 | U12683   | 1.2 |
| 129 | A_10_P024748 | CF270416 | 1.2 |
| 130 | A_10_P002589 | BC043975 | 1.2 |
| 131 | A_10_P006034 | BC074268 | 1.2 |
| 132 | A_10_P026945 | D29796   | 1.2 |
| 133 | A_10_P020384 | BX850685 | 1.2 |
| 134 | A_10_P007775 | BC081076 | 1.2 |
| 135 | A_10_P005508 | BC073267 | 1.2 |

**Supplemental Table S6:**

Genes significantly down-regulated in the presence of BPA alone in comparison to the untreated samples

|     |              |          |     |
|-----|--------------|----------|-----|
| 136 | A_10_P003807 | BC060027 | 1.2 |
| 137 | A_10_P003481 | BC055999 | 1.2 |
| 138 | A_10_P006590 | BC077275 | 1.2 |
| 139 | A_10_P008874 | BC084929 | 1.2 |
| 140 | A_10_P003249 | BC053786 | 1.2 |
| 141 | A_10_P003925 | BC060476 | 1.2 |
| 142 | A_10_P007448 | BC079773 | 1.2 |
| 143 | A_10_P024871 | CF284895 | 1.2 |
| 144 | A_10_P009087 | BC087307 | 1.2 |
| 145 | A_10_P005290 | BC072971 | 1.2 |
| 146 | A_10_P023290 | CB943692 | 1.2 |
| 147 | A_10_P020337 | BX850179 | 1.2 |
| 148 | A_10_P019848 | BX845098 | 1.2 |
| 149 | A_10_P006373 | BC076740 | 1.2 |
| 150 | A_10_P026197 | CN321906 | 1.2 |
| 151 | A_10_P026989 | L05540   | 1.2 |
| 152 | A_10_P003628 | BC057704 | 1.2 |
| 153 | A_10_P002612 | BC044008 | 1.2 |
| 154 | A_10_P021365 | CA973325 | 1.2 |
| 155 | A_10_P009038 | BC086290 | 1.2 |
| 156 | A_10_P002353 | BC042281 | 1.2 |
| 157 | A_10_P013922 | BJ064568 | 1.2 |
| 158 | A_10_P005916 | BC074120 | 1.2 |
| 159 | A_10_P001824 | AW767039 | 1.2 |
| 160 | A_10_P025776 | CK799171 | 1.2 |
| 161 | A_10_P027146 | M88594   | 1.2 |
| 162 | A_10_P004415 | BC070630 | 1.2 |
| 163 | A_10_P005033 | BC072304 | 1.2 |
| 164 | A_10_P004078 | BC068669 | 1.2 |
| 165 | A_10_P009344 | BC088930 | 1.2 |
| 166 | A_10_P020655 | BX853616 | 1.2 |
| 167 | A_10_P025862 | CK800034 | 1.2 |
| 168 | A_10_P006056 | BC074296 | 1.2 |
| 169 | A_10_P000101 | AB060971 | 1.2 |
| 170 | A_10_P006809 | BC077513 | 1.2 |
| 171 | A_10_P000393 | AF193799 | 1.2 |
| 172 | A_10_P024773 | CF271248 | 1.2 |
| 173 | A_10_P002346 | BC042272 | 1.2 |
| 174 | A_10_P023350 | CB983966 | 1.2 |
| 175 | A_10_P005448 | BC073197 | 1.2 |
| 176 | A_10_P000653 | AJ010497 | 1.2 |
| 177 | A_10_P008299 | BC082944 | 1.2 |
| 178 | A_10_P023258 | CB942955 | 1.2 |
| 179 | A_10_P008803 | BC084826 | 1.2 |
| 180 | A_10_P002911 | BC045125 | 1.2 |
| 181 | A_10_P002794 | BC044956 | 1.2 |
| 182 | A_10_P002545 | BC043879 | 1.2 |

**Supplemental Table S6:**

Genes significantly down-regulated in the presence of BPA alone in comparison to the untreated samples

|     |              |          |     |
|-----|--------------|----------|-----|
| 183 | A_10_P017412 | BQ385209 | 1.1 |
| 184 | A_10_P001868 | AW768051 | 1.1 |
| 185 | A_10_P000809 | AW148032 | 1.1 |
| 186 | A_10_P003095 | BC046748 | 1.1 |
| 187 | A_10_P008768 | BC084787 | 1.1 |
| 188 | A_10_P006370 | BC076737 | 1.1 |
| 189 | A_10_P002511 | BC043832 | 1.1 |
| 190 | A_10_P007580 | BC080054 | 1.1 |
| 191 | A_10_P019850 | BX845111 | 1.1 |
| 192 | A_10_P015766 | BJ640517 | 1.1 |
| 193 | A_10_P008918 | BC084974 | 1.1 |
| 194 | A_10_P007841 | BC081151 | 1.1 |
| 195 | A_10_P004463 | BC070682 | 1.1 |
| 196 | A_10_P003833 | BC060356 | 1.1 |
| 197 | A_10_P013874 | BJ061488 | 1.1 |
| 198 | A_10_P005517 | BC073276 | 1.1 |
| 199 | A_10_P024102 | CD325272 | 1.1 |
| 200 | A_10_P009340 | BC088922 | 1.1 |
| 201 | A_10_P004044 | BC064686 | 1.1 |
| 202 | A_10_P010678 | BF231749 | 1.1 |
| 203 | A_10_P007608 | BC080085 | 1.1 |
| 204 | A_10_P026573 | CV076884 | 1.1 |
| 205 | A_10_P014009 | BJ069449 | 1.1 |
| 206 | A_10_P000288 | AF080068 | 1.1 |
| 207 | A_10_P004806 | BC072035 | 1.1 |
| 208 | A_10_P006343 | BC076641 | 1.1 |
| 209 | A_10_P008791 | BC084811 | 1.1 |
| 210 | A_10_P009744 | BE131864 | 1.1 |
| 211 | A_10_P001233 | AW199570 | 1.1 |
| 212 | A_10_P007532 | BC079999 | 1.1 |
| 213 | A_10_P027271 | U42461   | 1.1 |
| 214 | A_10_P021227 | CA971219 | 1.1 |
| 215 | A_10_P009758 | BE132333 | 1.1 |
| 216 | A_10_P002909 | BC045121 | 1.1 |
| 217 | A_10_P004638 | BC070966 | 1.1 |
| 218 | A_10_P005106 | BC094146 | 1.1 |
| 219 | A_10_P020615 | BX853254 | 1.1 |
| 220 | A_10_P014922 | BC093541 | 1.1 |
| 221 | A_10_P024384 | CD328700 | 1.1 |
| 222 | A_10_P003316 | BC054220 | 1.1 |
| 223 | A_10_P006933 | BC077739 | 1.1 |
| 224 | A_10_P001419 | AW200505 | 1.1 |
| 225 | A_10_P005921 | BC074125 | 1.1 |
| 226 | A_10_P010675 | BF231739 | 1.1 |
| 227 | A_10_P000740 | AJ507633 | 1.1 |
| 228 | A_10_P000200 | AF002983 | 1.1 |
| 229 | A_10_P004667 | BC071004 | 1.1 |

**Supplemental Table S6:**

Genes significantly down-regulated in the presence of BPA alone in comparison to the untreated samples

|     |              |          |     |
|-----|--------------|----------|-----|
| 230 | A_10_P020702 | BX854078 | 1.1 |
| 231 | A_10_P001641 | AW640264 | 1.1 |
| 232 | A_10_P000755 | AJ605777 | 1.1 |
| 233 | A_10_P002502 | BC043822 | 1.1 |
| 234 | A_10_P003779 | BC059995 | 1.1 |
| 235 | A_10_P004079 | BC068670 | 1.1 |
| 236 | A_10_P016286 | BP687284 | 1.1 |
| 237 | A_10_P027173 | U04707   | 1.1 |
| 238 | A_10_P001554 | AW634109 | 1.1 |
| 239 | A_10_P009644 | BC092312 | 1.1 |
| 240 | A_10_P015646 | BJ637545 | 1.1 |
| 241 | A_10_P006676 | BC077363 | 1.1 |
| 242 | A_10_P009566 | BC091638 | 1.1 |
| 243 | A_10_P003378 | BC054297 | 1.1 |
| 244 | A_10_P003637 | BC057717 | 1.1 |
| 245 | A_10_P025175 | CF547537 | 1.1 |
| 246 | A_10_P013396 | BJ042323 | 1.1 |
| 247 | A_10_P025141 | CF522626 | 1.1 |
| 248 | A_10_P021643 | CA982484 | 1.1 |
| 249 | A_10_P001436 | AW200567 | 1.1 |
| 250 | A_10_P008635 | BC084409 | 1.1 |
| 251 | A_10_P015044 | BJ611886 | 1.1 |
| 252 | A_10_P007864 | BC081174 | 1.1 |
| 253 | A_10_P025767 | CK799110 | 1.1 |
| 254 | A_10_P027246 | U35408   | 1.1 |
| 255 | A_10_P003750 | BC059961 | 1.1 |
| 256 | A_10_P001771 | AW765260 | 1.1 |
| 257 | A_10_P005004 | BC072274 | 1.1 |
| 258 | A_10_P025241 | CF548599 | 1.1 |
| 259 | A_10_P027136 | M80257   | 1.1 |
| 260 | A_10_P013907 | BJ063234 | 1.1 |
| 261 | A_10_P004736 | BC071093 | 1.1 |
| 262 | A_10_P003149 | BC047162 | 1.1 |
| 263 | A_10_P015853 | BJ643128 | 1.1 |
| 264 | A_10_P023399 | CD099184 | 1.1 |
| 265 | A_10_P003198 | BC048020 | 1.1 |
| 266 | A_10_P012429 | BG552075 | 1.1 |
| 267 | A_10_P002429 | BC043735 | 1.1 |
| 268 | A_10_P015409 | BJ630946 | 1.1 |
| 269 | A_10_P016869 | BP713293 | 1.1 |
| 270 | A_10_P006890 | BC077601 | 1.1 |
| 271 | A_10_P016688 | BP704578 | 1.1 |
| 272 | A_10_P007237 | BC078077 | 1.1 |
| 273 | A_10_P024970 | CF288385 | 1.1 |
| 274 | A_10_P020435 | BX851307 | 1.1 |
| 275 | A_10_P011048 | BG016443 | 1.1 |
| 276 | A_10_P005861 | BC073697 | 1.1 |

**Supplemental Table S6:**

Genes significantly down-regulated in the presence of BPA alone in comparison to the untreated samples

|     |              |          |     |
|-----|--------------|----------|-----|
| 277 | A_10_P027216 | U20977   | 1.1 |
| 278 | A_10_P020246 | BX849284 | 1.1 |
| 279 | A_10_P008301 | BC082946 | 1.1 |
| 280 | A_10_P021455 | CA974269 | 1.1 |
| 281 | A_10_P020595 | BX853095 | 1.1 |
| 282 | A_10_P006499 | BC077065 | 1.1 |
| 283 | A_10_P002285 | BC041732 | 1.1 |
| 284 | A_10_P001621 | AW638861 | 1.1 |
| 285 | A_10_P015017 | BJ099110 | 1.1 |
| 286 | A_10_P005831 | BC073664 | 1.1 |
| 287 | A_10_P000375 | AF182522 | 1.1 |
| 288 | A_10_P009187 | BC087461 | 1.1 |
| 289 | A_10_P000005 | AB003358 | 1.1 |
| 290 | A_10_P003349 | BC054257 | 1.1 |
