# Supplementary material
Source: PubMed Central journal article supplement (PMC2689811)
Supplement: en.2008-1503_10.pdf [file en.2008-1503_10.pdf]

**Supplemental Table S8:**

Genes significantly up-regulated by BPA in the presence of T3

|    | <b>Probe Name</b> | <b>GenBank</b> | <b>Fold change</b> |
|----|-------------------|----------------|--------------------|
| 1  | A_10_P017113      | BP727358       | 8.9                |
| 2  | A_10_P012561      | BG579849       | 7.0                |
| 3  | A_10_P025160      | CF546899       | 6.8                |
| 4  | A_10_P017110      | BP727251       | 5.2                |
| 5  | A_10_P014195      | BJ077016       | 4.9                |
| 6  | A_10_P013239      | BJ029671       | 3.2                |
| 7  | A_10_P023511      | CD253118       | 2.4                |
| 8  | A_10_P022416      | CB560198       | 2.2                |
| 9  | A_10_P023432      | CD100271       | 2.1                |
| 10 | A_10_P000771      | AJ890844       | 2.0                |
| 11 | A_10_P023700      | CD255175       | 2.0                |
| 12 | A_10_P011647      | BG038309       | 2.0                |
| 13 | A_10_P015070      | BJ613977       | 2.0                |
| 14 | A_10_P025385      | CK741953       | 2.0                |
| 15 | A_10_P026167      | CN318237       | 1.9                |
| 16 | A_10_P008608      | BC084379       | 1.9                |
| 17 | A_10_P016959      | BP717857       | 1.8                |
| 18 | A_10_P023517      | CD253165       | 1.7                |
| 19 | A_10_P013884      | BJ062152       | 1.7                |
| 20 | A_10_P011048      | BG016443       | 1.7                |
| 21 | A_10_P020306      | BX849853       | 1.7                |
| 22 | A_10_P019859      | BX845224       | 1.6                |
| 23 | A_10_P000423      | AF231035       | 1.6                |
| 24 | A_10_P016193      | BP683833       | 1.6                |
| 25 | A_10_P011522      | BG022969       | 1.5                |
| 26 | A_10_P022924      | CB564703       | 1.5                |
| 27 | A_10_P015773      | BJ640739       | 1.5                |
| 28 | A_10_P013082      | BI444085       | 1.5                |
| 29 | A_10_P020526      | BX852250       | 1.5                |
| 30 | A_10_P000139      | AB087137       | 1.5                |
| 31 | A_10_P003590      | BC056128       | 1.4                |
| 32 | A_10_P007775      | BC081076       | 1.4                |
| 33 | A_10_P003291      | BC054185       | 1.4                |
| 34 | A_10_P017788      | BQ730558       | 1.4                |
| 35 | A_10_P002369      | BC042305       | 1.4                |
| 36 | A_10_P013919      | BJ064159       | 1.4                |
| 37 | A_10_P015575      | BJ635765       | 1.4                |
| 38 | A_10_P008681      | BC084621       | 1.4                |
| 39 | A_10_P000653      | AJ010497       | 1.4                |
| 40 | A_10_P020619      | BX853308       | 1.4                |
| 41 | A_10_P007716      | BC081011       | 1.4                |
| 42 | A_10_P017412      | BQ385209       | 1.4                |

**Supplemental Table S8:**

Genes significantly up-regulated by BPA in the presence of T3

|    |              |          |     |
|----|--------------|----------|-----|
| 43 | A_10_P005183 | BC072842 | 1.4 |
| 44 | A_10_P027146 | M88594   | 1.4 |
| 45 | A_10_P014864 | BJ092479 | 1.4 |
| 46 | A_10_P008992 | BC085208 | 1.3 |
| 47 | A_10_P010678 | BF231749 | 1.3 |
| 48 | A_10_P005448 | BC073197 | 1.3 |
| 49 | A_10_P005567 | BC073341 | 1.3 |
| 50 | A_10_P001211 | AW199326 | 1.3 |
| 51 | A_10_P023994 | CD302379 | 1.3 |
| 52 | A_10_P007908 | BC081221 | 1.3 |
| 53 | A_10_P027070 | M18350   | 1.3 |
| 54 | A_10_P012298 | BG486020 | 1.3 |
| 55 | A_10_P004290 | BC068934 | 1.3 |
| 56 | A_10_P023399 | CD099184 | 1.3 |
| 57 | A_10_P024102 | CD325272 | 1.3 |
| 58 | A_10_P027265 | U41858   | 1.3 |
| 59 | A_10_P015648 | BJ637619 | 1.3 |
| 60 | A_10_P020375 | BX850582 | 1.3 |
| 61 | A_10_P008639 | BC084414 | 1.3 |
| 62 | A_10_P024894 | CF285602 | 1.3 |
| 63 | A_10_P013618 | BJ050186 | 1.3 |
| 64 | A_10_P026891 | CX134797 | 1.3 |
| 65 | A_10_P024337 | CD327946 | 1.3 |
| 66 | A_10_P008506 | BC084269 | 1.3 |
| 67 | A_10_P015055 | BJ612498 | 1.3 |
| 68 | A_10_P009044 | BC086297 | 1.3 |
| 69 | A_10_P020156 | BX848330 | 1.3 |
| 70 | A_10_P014104 | BJ074182 | 1.3 |
| 71 | A_10_P023503 | CD253019 | 1.3 |
| 72 | A_10_P023232 | CB942193 | 1.3 |
| 73 | A_10_P027230 | U26404   | 1.3 |
| 74 | A_10_P003515 | BC056038 | 1.3 |
| 75 | A_10_P008864 | BC084912 | 1.3 |
| 76 | A_10_P015646 | BJ637545 | 1.3 |
| 77 | A_10_P020527 | BX852260 | 1.3 |
| 78 | A_10_P004416 | BC070631 | 1.3 |
| 79 | A_10_P003601 | BC056840 | 1.3 |
| 80 | A_10_P008689 | BC084631 | 1.3 |
| 81 | A_10_P012287 | BG439844 | 1.3 |
| 82 | A_10_P004480 | BC070704 | 1.3 |
| 83 | A_10_P003472 | BC055989 | 1.3 |
| 84 | A_10_P025958 | CK800731 | 1.2 |
| 85 | A_10_P012367 | BG513927 | 1.2 |
| 86 | A_10_P010968 | BF614568 | 1.2 |
| 87 | A_10_P013871 | BJ061090 | 1.2 |
| 88 | A_10_P009038 | BC086290 | 1.2 |
| 89 | A_10_P008134 | BC082653 | 1.2 |

**Supplemental Table S8:**

Genes significantly up-regulated by BPA in the presence of T3

|     |              |          |     |
|-----|--------------|----------|-----|
| 90  | A_10_P005294 | BC072977 | 1.2 |
| 91  | A_10_P024630 | CD362469 | 1.2 |
| 92  | A_10_P002012 | BC097591 | 1.2 |
| 93  | A_10_P013874 | BJ061488 | 1.2 |
| 94  | A_10_P024332 | CD327911 | 1.2 |
| 95  | A_10_P016954 | BP717767 | 1.2 |
| 96  | A_10_P025191 | CF547820 | 1.2 |
| 97  | A_10_P023260 | CB943041 | 1.2 |
| 98  | A_10_P007284 | BC078128 | 1.2 |
| 99  | A_10_P002440 | BC043747 | 1.2 |
| 100 | A_10_P002715 | BC044269 | 1.2 |
| 101 | A_10_P021668 | CA982713 | 1.2 |
| 102 | A_10_P002032 | AY289193 | 1.2 |
| 103 | A_10_P003064 | BC046710 | 1.2 |
| 104 | A_10_P011433 | BG022275 | 1.2 |
| 105 | A_10_P020512 | BX852055 | 1.2 |
| 106 | A_10_P001772 | AW765313 | 1.2 |
| 107 | A_10_P003019 | BC046658 | 1.2 |
| 108 | A_10_P004141 | BC068747 | 1.2 |
| 109 | A_10_P026926 | CX135575 | 1.2 |
| 110 | A_10_P010612 | BF072060 | 1.2 |
| 111 | A_10_P012221 | BG438691 | 1.2 |
| 112 | A_10_P005293 | BC072976 | 1.2 |
| 113 | A_10_P004984 | BC072252 | 1.2 |
| 114 | A_10_P007927 | BC081241 | 1.2 |
| 115 | A_10_P006499 | BC077065 | 1.2 |
| 116 | A_10_P025488 | CK796739 | 1.2 |
| 117 | A_10_P003546 | BC056076 | 1.2 |
| 118 | A_10_P006477 | BC076852 | 1.2 |
| 119 | A_10_P023125 | CB756001 | 1.2 |
| 120 | A_10_P005804 | BC073624 | 1.2 |
| 121 | A_10_P021662 | CA982667 | 1.2 |
| 122 | A_10_P009074 | BC086634 | 1.2 |
| 123 | A_10_P023452 | CD101039 | 1.2 |
| 124 | A_10_P003806 | BC060026 | 1.2 |
| 125 | A_10_P027342 | U76636   | 1.2 |
| 126 | A_10_P007054 | BC077877 | 1.2 |
| 127 | A_10_P024348 | CD328086 | 1.2 |
| 128 | A_10_P012612 | BG731491 | 1.2 |
| 129 | A_10_P002760 | BC044332 | 1.2 |
| 130 | A_10_P021611 | CA982120 | 1.2 |
| 131 | A_10_P019934 | BX846071 | 1.2 |
| 132 | A_10_P020060 | BX847376 | 1.2 |
| 133 | A_10_P012005 | BG234611 | 1.2 |
| 134 | A_10_P000809 | AW148032 | 1.2 |
| 135 | A_10_P016350 | BP689799 | 1.2 |
| 136 | A_10_P002998 | BC046372 | 1.2 |

**Supplemental Table S8:**

Genes significantly up-regulated by BPA in the presence of T3

|     |              |          |     |
|-----|--------------|----------|-----|
| 137 | A_10_P005829 | BC073659 | 1.2 |
| 138 | A_10_P010359 | BC097726 | 1.2 |
| 139 | A_10_P001253 | BC099031 | 1.2 |
| 140 | A_10_P014009 | BJ069449 | 1.2 |
| 141 | A_10_P019982 | BX846558 | 1.2 |
| 142 | A_10_P009111 | BC087341 | 1.2 |
| 143 | A_10_P021643 | CA982484 | 1.2 |
| 144 | A_10_P020615 | BX853254 | 1.2 |
| 145 | A_10_P002766 | BC044675 | 1.2 |
| 146 | A_10_P007216 | BC078055 | 1.2 |
| 147 | A_10_P004620 | BC070856 | 1.2 |
| 148 | A_10_P023258 | CB942955 | 1.2 |
| 149 | A_10_P001952 | AY062923 | 1.2 |
| 150 | A_10_P027489 | X93494   | 1.2 |
| 151 | A_10_P006308 | BC075217 | 1.2 |
| 152 | A_10_P000523 | AF353715 | 1.2 |
| 153 | A_10_P024852 | CF284278 | 1.2 |
| 154 | A_10_P020560 | BX852606 | 1.2 |
| 155 | A_10_P005065 | BC072341 | 1.2 |
| 156 | A_10_P008667 | BC084604 | 1.2 |
| 157 | A_10_P008876 | BC084931 | 1.2 |
| 158 | A_10_P005119 | BC072750 | 1.2 |
| 159 | A_10_P011418 | BG022162 | 1.2 |
| 160 | A_10_P003277 | BC054158 | 1.1 |
| 161 | A_10_P003249 | BC053786 | 1.1 |
| 162 | A_10_P006373 | BC076740 | 1.1 |
| 163 | A_10_P020207 | BX848880 | 1.1 |
| 164 | A_10_P008823 | BC084852 | 1.1 |
| 165 | A_10_P009741 | BE131768 | 1.1 |
| 166 | A_10_P009171 | BC087436 | 1.1 |
| 167 | A_10_P026913 | CX135253 | 1.1 |
| 168 | A_10_P020772 | BX854953 | 1.1 |
| 169 | A_10_P003865 | BC060405 | 1.1 |
| 170 | A_10_P011172 | BC097925 | 1.1 |
| 171 | A_10_P007580 | BC080054 | 1.1 |
| 172 | A_10_P001449 | AW200620 | 1.1 |
| 173 | A_10_P023292 | CB943738 | 1.1 |
| 174 | A_10_P003822 | BC060344 | 1.1 |
| 175 | A_10_P002104 | AY573848 | 1.1 |
| 176 | A_10_P022638 | CB561838 | 1.1 |
| 177 | A_10_P003141 | BC046950 | 1.1 |
| 178 | A_10_P016552 | BP698904 | 1.1 |
| 179 | A_10_P011707 | BG160461 | 1.1 |
| 180 | A_10_P020765 | BX854874 | 1.1 |
| 181 | A_10_P004120 | BC068719 | 1.1 |
| 182 | A_10_P007482 | BC079814 | 1.1 |
| 183 | A_10_P000476 | AF288422 | 1.1 |

**Supplemental Table S8:**

Genes significantly up-regulated by BPA in the presence of T3

|     |              |          |     |
|-----|--------------|----------|-----|
| 184 | A_10_P005746 | BC073550 | 1.1 |
| 185 | A_10_P021293 | CA972222 | 1.1 |
| 186 | A_10_P004961 | BC072225 | 1.1 |
| 187 | A_10_P003014 | BC046653 | 1.1 |
| 188 | A_10_P001683 | AW642902 | 1.1 |
| 189 | A_10_P008299 | BC082944 | 1.1 |
| 190 | A_10_P003095 | BC046748 | 1.1 |
| 191 | A_10_P010820 | BF610772 | 1.1 |
| 192 | A_10_P006916 | BC077629 | 1.1 |
| 193 | A_10_P004385 | BC070596 | 1.1 |
| 194 | A_10_P020753 | BX854738 | 1.1 |
| 195 | A_10_P004980 | BC072248 | 1.1 |
| 196 | A_10_P000127 | AB080021 | 1.1 |
| 197 | A_10_P004793 | BC071159 | 1.1 |
| 198 | A_10_P001858 | AW767915 | 1.1 |
| 199 | A_10_P017357 | BQ109706 | 1.1 |
| 200 | A_10_P003628 | BC057704 | 1.1 |
| 201 | A_10_P007520 | BC079987 | 1.1 |
| 202 | A_10_P026989 | L05540   | 1.1 |
| 203 | A_10_P009396 | BC089131 | 1.1 |
| 204 | A_10_P005226 | BC072894 | 1.1 |
| 205 | A_10_P002136 | AY714078 | 1.1 |
| 206 | A_10_P008847 | BC084880 | 1.1 |
| 207 | A_10_P002148 | AY762616 | 1.1 |
| 208 | A_10_P014111 | BJ074424 | 1.1 |
| 209 | A_10_P004149 | BC068755 | 1.1 |
| 210 | A_10_P016129 | BM928998 | 1.1 |
| 211 | A_10_P000194 | AB191720 | 1.1 |
| 212 | A_10_P002078 | AY484582 | 1.1 |
| 213 | A_10_P007751 | BC081049 | 1.1 |
| 214 | A_10_P013060 | BI443191 | 1.1 |
| 215 | A_10_P018058 | BQ734819 | 1.1 |
| 216 | A_10_P009128 | BC087373 | 1.1 |
| 217 | A_10_P006929 | BC077701 | 1.1 |
| 218 | A_10_P002397 | BC042356 | 1.1 |
| 219 | A_10_P013615 | BJ050080 | 1.1 |
| 220 | A_10_P007367 | BC079680 | 1.1 |
| 221 | A_10_P024444 | CD329717 | 1.1 |
| 222 | A_10_P004572 | BC070803 | 1.1 |
| 223 | A_10_P004535 | BC070766 | 1.1 |
| 224 | A_10_P006244 | BC075132 | 1.1 |
| 225 | A_10_P004350 | BC070546 | 1.1 |
| 226 | A_10_P013396 | BJ042323 | 1.1 |
| 227 | A_10_P007444 | BC079769 | 1.1 |
| 228 | A_10_P001682 | AW642827 | 1.1 |
| 229 | A_10_P005981 | BC074198 | 1.1 |
| 230 | A_10_P020047 | BX847250 | 1.1 |

**Supplemental Table S8:**

Genes significantly up-regulated by BPA in the presence of T3

|     |              |          |     |
|-----|--------------|----------|-----|
| 231 | A_10_P005236 | BC072907 | 1.1 |
| 232 | A_10_P007514 | BC079981 | 1.1 |
| 233 | A_10_P002579 | BC043961 | 1.1 |
| 234 | A_10_P006077 | BC074321 | 1.1 |
| 235 | A_10_P011877 | BG162155 | 1.1 |
| 236 | A_10_P003519 | BC056042 | 1.1 |
| 237 | A_10_P004175 | BC068782 | 1.1 |
| 238 | A_10_P007289 | BC078134 | 1.1 |
| 239 | A_10_P007673 | BC080402 | 1.1 |
| 240 | A_10_P012903 | BI312892 | 1.1 |
| 241 | A_10_P027450 | X68683   | 1.1 |
| 242 | A_10_P004455 | BC070671 | 1.1 |
| 243 | A_10_P002721 | BC044275 | 1.1 |
| 244 | A_10_P014239 | BJ077953 | 1.1 |
| 245 | A_10_P019800 | BX844453 | 1.1 |
| 246 | A_10_P004709 | BC071053 | 1.1 |
| 247 | A_10_P003657 | BC057739 | 1.1 |
| 248 | A_10_P006490 | BC076865 | 1.1 |
| 249 | A_10_P005517 | BC073276 | 1.1 |
| 250 | A_10_P008195 | BC082817 | 1.1 |
| 251 | A_10_P006655 | BC077340 | 1.1 |
| 252 | A_10_P005658 | BC073444 | 1.1 |
| 253 | A_10_P015867 | BJ643453 | 1.1 |
| 254 | A_10_P010155 | BE575499 | 1.1 |
| 255 | A_10_P002294 | BC041742 | 1.1 |
| 256 | A_10_P004500 | BC070728 | 1.1 |
| 257 | A_10_P004639 | BC070968 | 1.1 |
| 258 | A_10_P007048 | BC077871 | 1.1 |
| 259 | A_10_P002396 | BC042355 | 1.1 |
| 260 | A_10_P025786 | CK799249 | 1.1 |
| 261 | A_10_P020645 | BX853527 | 1.1 |
| 262 | A_10_P007273 | BC078117 | 1.1 |
| 263 | A_10_P025849 | CK799919 | 1.1 |
| 264 | A_10_P007985 | BC082365 | 1.1 |
| 265 | A_10_P006387 | BC076754 | 1.1 |
